# Supplementary material
Source: ML conference proceedings conference paper supplement (https://openaccess.thecvf.com/content/CVPR2025/html/Lee_Localized_Concept_Erasure_CVPR_2025_paper.html)
Supplement: Supplementary file 1 [file Lee_Localized_Concept_Erasure_CVPR_2025_supplemental.pdf]

# Localized Concept Erasure for Text-to-Image Diffusion Models Using Training-Free Gated Low-Rank Adaptation

## Appendix

Byung Hyun Lee<sup>1,\*</sup>, Sungjin Lim<sup>2,\*</sup>, Se Young Chun<sup>1,2,3,†</sup>  
<sup>1</sup>Department of ECE, <sup>2</sup>IPAI, <sup>3</sup>INMC, Seoul National University  
 {ldlqudgus756, sjin.lim, sychun}@snu.ac.kr

### A. Preliminaries

#### A.1. Latent Diffusion Model

The proposed method, GLoCE, leverages Stable Diffusion (SD) [A25], which is built upon Latent Diffusion Models (LDM) [A24]. It conducts diffusion within the latent space of an autoencoder. It comprises two key components: a diffusion model [A3, A14, A26] and a vector quantization autoencoder [A28]. The autoencoder is pre-trained to map an image  $I$  into spatial latent codes using an encoder ( $x = \mathcal{E}(I)$ ) and to reconstruct the image through a decoder ( $\mathcal{D}(\mathcal{E}(I))$ ). The diffusion model is trained to generate latents that align with the autoencoder’s latent space. Specifically, the goal of the text-to-image (T2I) latent diffusion model for a text embedding  $E$  at timestep  $t$  is:

$$\mathcal{L}_{\text{LDM}} = \mathbb{E}_{x \sim \mathcal{E}(I), E, \epsilon \sim \mathcal{N}(0,1), t} \left[ \|\epsilon - \epsilon_\theta(x_t, t, E)\|_2^2 \right]$$

where  $x_t$  denotes the noisy latent at timestep  $t$ ,  $\epsilon$  is sampled from a normal distribution, and  $\epsilon_\theta$  represents the denoising diffusion model parameterized by  $\theta$ .

#### A.2. Preliminaries of Prior Arts

**ESD** [A8], inspired from energy-based composition [A4, A5], reduces the likelihood of generating an image from the latent  $x$  by decreasing the probability on the *text* embedding  $E_{\text{tar}}$  of the target concept with a scaling factor  $\eta$ :

$$P_\theta(x) \propto \frac{P_{\theta^*}(x)}{P_{\theta^*}(E_{\text{tar}}|x)^\eta}$$

where  $P_{\theta^*}(x)$  is the distribution generated by the original model. It updates the model with a gradient for  $P_\theta(x)$ :

$$\nabla \log P_\theta(x) - \eta(\nabla \log P_{\theta^*}(x|E_{\text{tar}}) - \nabla \log P_{\theta^*}(x))$$

Finally, it updates the model by Tweedie’s formula [A6]:

$$\begin{aligned} \epsilon_\theta(x_t, E_{\text{tar}}, t) &\leftarrow \epsilon_{\theta^*}(x_t, t) \\ &\quad - \eta[\epsilon_{\theta^*}(x_t, E_{\text{tar}}, t) - \epsilon_{\theta^*}(x_t, t)]. \end{aligned}$$

\*Equal contribution. † Corresponding author.

Especially it empirically verified that updating only CA layers (ESD-x) can selectively erase the target concept, while fine-tuning all parameters (ESD-u) in the model can holistically erase the image containing the target concept.

**UCE** [A9] uses a closed-form solution for the linear projections  $W'$  of keys and values in the cross-attention layers:

$$\begin{aligned} W_{\text{new}} = \arg \min_{W'} & \sum_{n=1}^N \|W' E_{\text{tar}}^n - W_{\text{old}} E_{\text{map}}^n\|_F^2 \\ & + \lambda \sum_{m=1}^M \|W' E_{\text{anc}}^m - W_{\text{old}} E_{\text{anc}}^m\|_F^2, \end{aligned} \quad (\text{A.1})$$

where  $W_{\text{old}}$  is the original projection,  $E_{\text{map}}^n$  and  $E_{\text{anc}}^n$  are the text embeddings of mapping and anchor concepts.

**MACE** [A18] enhances the erasure of the target concept by employing SAM [A16] to generate segmentation masks for suppressing attention of the target concept within the CA maps. To train the model, LoRA modules are added to the CA layers for each target concept, and a loss function integrates these multiple LoRAs. The loss function also includes a term aimed at preserving the remaining concepts, preventing the forgetting of concepts similar to the target.

**RECE** [A10] also builds on the closed-form solution and improves resilience to adversarial prompt attacks. It operates by iteratively generating an adversarial prompt  $E_{\text{adv}}$  and defending this adversarial prompt. To achieve this, it produces the adversarial prompt by solving the following closed-form optimization objective:

$$\min_E \sum_l \|W_{\text{new}}^l E' - W_{\text{old}}^l E_{\text{tar}}\|_2^2 + \lambda \|E\|_2^2, \quad (\text{A.2})$$

where  $l$  is the index of layers in a diffusion model. For the generated adversarial prompt,  $W_{\text{old}}$  in Eq. (A.1) is replaced with  $W_{\text{new}}$ , and the weights are recomputed to defend the adversarial prompt. Through the iterative optimization of Eq. (A.1) and Eq. (A.2), RECE effectively mitigates the impact of adversarial prompt attacks.

## B. Proof of Closed-Form LoRA

Let  $X^{\text{tar}} \in \mathbb{R}^D$  be an embedding in a model and  $Z^{\text{tar}}$  be highly correlated to  $X^{\text{tar}}$ . In the main text, we modified the objective proposed in LEACE [A1] for concept erasing with respect to the linear projection  $PX^{\text{tar}} + b$  as follows:

$$\min_{P, b} \mathbb{E} \left[ \|PX^{\text{tar}} + b - \eta(P^{\text{map}}(X^{\text{tar}} - \mu^{\text{tar}}) + \mu^{\text{map}})\|_2^2 \right], \quad (\text{B.1})$$

s.t.,  $\text{Cov}(PX^{\text{tar}}, Z^{\text{tar}}) = \mathbf{0}$ , where  $P^{\text{map}} = V^{\text{map}}(V^{\text{map}})^T$  and  $\mu^{\text{map}} = \mathbb{E}[X^{\text{map}}]$ . We also set  $Z^{\text{tar}}$  as:

$$Z^{\text{tar}} = \hat{V}^{\text{tar}}(\hat{V}^{\text{tar}})^T(X^{\text{tar}} - \mathbb{E}[X^{\text{tar}}]) + \mathbb{E}[X^{\text{tar}}]. \quad (\text{B.2})$$

For this, we derived the closed-form solution of  $P^*$  and  $b^*$  minimizing Eq. (B.1) in Proposition 1. To prove Proposition 1 in the main text, we first prove two lemmas borrowing the procedure of the algebraic proof of LEACE [A1]. In Lemma 1, we derive the solution  $P^*$  that minimizes Eq. (B.1) for an arbitrary  $Z^{\text{tar}}$  when  $X^{\text{tar}}$  and  $X^{\text{map}}$  are unbiased. Subsequently, in Lemma 2, we extend the solution  $P^*$  and  $b^*$  when  $X^{\text{tar}}$  and  $X^{\text{map}}$  are biased. Based on Lemma 1 and Lemma 2, we determine the closed-form solution of  $P^*$  and  $b^*$  when  $Z^{\text{tar}}$  is defined as in Eq. (B.2). This procedure is intuitively illustrated in Fig. B.1.

**Lemma 1.** Suppose that  $X^{\text{tar}}$  and  $X^{\text{map}}$  are unbiased. That is,  $b^* = 0$  and the objective Eq. (B.1) is reduce to:

$$\min_{P, b} \mathbb{E} \left[ \|PX^{\text{tar}} - \eta P^{\text{map}} X^{\text{tar}}\|_2^2 \right]. \quad (\text{B.3})$$

Then, the solution for the projection  $P$  is represented as:

$$P^* = P^{\text{map}}(I - W^+QW), \quad (\text{B.4})$$

where  $W$  is the whitening transformation defined as  $W = (\text{Cov}(X^{\text{tar}})^{1/2})^+$ ,  $+$  is Moore–Penrose inverse of a matrix, and  $Q = (W \text{Cov}(X^{\text{tar}}, Z^{\text{tar}}))(W \text{Cov}(X^{\text{tar}}, Z^{\text{tar}}))^+$ .

*Proof.* Since each row  $P_i$  of  $P$  can represent an independent optimization problem, we decompose Eq. (B.3) into row-wise separate problem with corresponding row  $P_i^{\text{map}}$ :

$$\arg \min_{P_i \in \mathbb{R}^d} \mathbb{E} \left[ (P_i X^{\text{tar}} - \eta P_i^{\text{map}} X^{\text{tar}})^2 \right] \quad (\text{B.5})$$

$$\text{s.t. } \text{Cov}(P_i X^{\text{tar}}, Z) = 0. \quad (\text{B.6})$$

Let  $\ell = \text{rank}(\text{Cov}(X^{\text{tar}}, Z^{\text{tar}})) = \text{rank}(W \text{Cov}(X^{\text{tar}}, Z^{\text{tar}}))$  and  $m = \text{rank}(\text{Cov}(X^{\text{tar}})) = \text{rank}(\text{Cov}(WX^{\text{tar}}))$ . Note that  $X^{\text{tar}}$  is **almost surely** equivalent to a linear combination of uncorrelated components in  $WX^{\text{tar}}$ . Consequently, any component of  $\eta P^{\text{map}} X^{\text{tar}}$  can almost surely be represented as a linear combination of the nontrivial components:

$$\begin{aligned} \eta(P^{\text{map}} X^{\text{tar}})_i &= \eta(P^{\text{map}} W^+ W X^{\text{tar}})_i \\ &= \eta \sum_{j=1}^m (P^{\text{map}} W^+)_ij (W X^{\text{tar}})_j. \end{aligned}$$

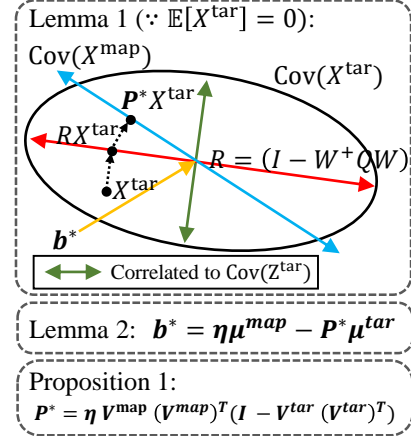

Figure B.1. Illustration of derivation of closed-form solution.

Moreover, any component of  $PX^{\text{tar}}$  can be written as a linear combination of the nontrivial components of  $X$  as:

$$(PX^{\text{tar}})_i = \sum_{j=1}^m A_{ij} (WX^{\text{tar}})_j + \sum_{j=m+1}^D B_{ij} (UX^{\text{tar}})_j,$$

where  $U = I - W^+ W$ . It can also be represented as:

$$P = AW + BU.$$

Here,  $U$  serves as the orthogonal projection matrix for the components of  $X$  which are almost surely zero. Thus, the  $i$ -th sub-objective of Eq. (B.3) becomes:

$$\begin{aligned} &\mathbb{E} \left[ (P_i X^{\text{tar}} - \eta P_i^{\text{map}} X^{\text{tar}})^2 \right] \\ &= \mathbb{E} \left[ \left( \sum_{j=1}^m (A_{ij} - (\eta P^{\text{map}} W^+)_ij) (WX^{\text{tar}})_j \right)^2 \right] \\ &= \sum_{j=1}^m (A_{ij} - (\eta P^{\text{map}} W^+)_ij)^2, \end{aligned}$$

where we can ignore the almost surely zero terms  $B_{ij}(UX^{\text{tar}})_j$  for  $j > m$ , and the first  $m$  components of  $WX^{\text{tar}}$  have identity covariance. Since  $PX^{\text{tar}}$  is almost surely equal to  $AWX^{\text{tar}}$ , we can easily show that:

$$\text{Cov}(PX^{\text{tar}}, Z^{\text{tar}}) = \text{Cov}(AWX^{\text{tar}}, Z^{\text{tar}}) = 0.$$

To achieve this,  $A_{ij} = 0$  when  $j \leq \ell$  since the first  $\ell$  components are those for which  $WX$  correlates with  $Z$ . Then, the objective is minimized for  $A_{ij} = (P^{\text{map}} W^+)_ij$  when  $j > \ell$ , which implies

$$A = P^{\text{map}} W^+ (I - Q).$$

Since  $B$  doesn't affect on the objective,  $B = P^{\text{map}}$  gives us:

$$P^* = P^{\text{map}}(I - W^+ QW).$$

□

**Lemma 2.** For arbitrary  $X^{\text{tar}}$  and  $X^{\text{map}}$ , Eq. (B.1) is minimized when  $P^*$  is represented as Eq. (B.4) and  $b^*$  is:

$$b^* = \eta \mu^{\text{map}} - P \mu^{\text{tar}}. \quad (\text{B.7})$$

*Proof.* We now consider that the mean of  $X^{\text{tar}}$  and  $X^{\text{map}}$  is non-zero and derive the solution of Eq. (B.1). Let  $X_r^{\text{tar}} = X^{\text{tar}} - \mu^{\text{tar}}$  and  $h = b - \eta \mu^{\text{map}} + P \mu^{\text{tar}}$ . Then, we rewrite Eq. (B.1) as follows:

$$\begin{aligned} & \mathbb{E} \left[ \left\| P X_r^{\text{tar}} + b - \eta (P^{\text{map}}(X_r^{\text{tar}} - \mu^{\text{tar}}) + \mu^{\text{sur}}) \right\|_2^2 \right] \\ &= \mathbb{E} \left[ \left\| P X_r^{\text{tar}} - \eta P^{\text{map}} X_r^{\text{tar}} + h \right\|_2^2 \right] \\ &= \mathbb{E} \left[ \left\| P X_r^{\text{tar}} - \eta P^{\text{map}} X_r^{\text{tar}} \right\|_2^2 \right] \\ &\quad - 2 \mathbb{E} \left[ P X_r^{\text{tar}} - \eta P^{\text{map}} X_r^{\text{tar}} \right]^T h + h^T h \\ &= \mathbb{E} \left[ \left\| P X_r^{\text{tar}} - \eta P^{\text{map}} X_r^{\text{tar}} \right\|_2^2 \right] + h^T h, \end{aligned} \quad (\text{B.8})$$

as  $\mathbb{E} [P X_r^{\text{tar}} - \eta P^{\text{map}} X_r^{\text{tar}}] = (P - \eta P^{\text{map}}) \mathbb{E} [X_r^{\text{tar}}] = \mathbf{0}$ . Thus, Eq. (B.8) is minimized when  $P^*$  is represented as Eq. (B.4) and  $b^* = \eta \mu^{\text{map}} - P \mu^{\text{tar}}$  (that is,  $h = \mathbf{0}$ ). □

**Proposition 1.** Let  $Z^{\text{tar}}$  be defined as Eq. (B.2). Then, the linear projection  $P^*$  and bias  $b^*$  that minimize Eq. (B.1) is:

$$P^* = \eta \hat{V}^{\text{map}} (\hat{V}^{\text{map}})^T \left( I - \hat{V}^{\text{tar}} (\hat{V}^{\text{tar}})^T \right), \quad (\text{B.9})$$

$$b^* = \eta \mu^{\text{map}} - P^* \mu^{\text{tar}}. \quad (\text{B.10})$$

*Proof.* Based on Lemma 1 and Lemma 2, we find the exact solution of  $P^*$  with Eq. (B.2). We can show that  $\text{Cov}(X^{\text{tar}}, Z^{\text{tar}})$  can be represented as:

$$\text{Cov}(X^{\text{tar}}, Z^{\text{tar}}) = \text{Cov}(X^{\text{tar}}) \hat{V}^{\text{tar}} (\hat{V}^{\text{tar}})^T.$$

We note that we represented the singular value decomposition of  $\text{Cov}(X^{\text{tar}})$  as  $V^{\text{tar}} S^{\text{tar}} (V^{\text{tar}})^T$  and  $\hat{V}^{\text{tar}}$  corresponds to top- $r_1$  singular values of  $V^{\text{tar}}$  in the main text. Therefore,

$$\begin{aligned} W \text{Cov}(X^{\text{tar}}, Z^{\text{tar}}) &= V^{\text{tar}} (S^{\text{tar}})^{1/2} (V^{\text{tar}})^T \hat{V}^{\text{tar}} (\hat{V}^{\text{tar}})^T \\ &= V^{\text{tar}} (S^{\text{tar}})^{1/2} (\tilde{V}^{\text{tar}})^T, \end{aligned}$$

where  $\tilde{V}^{\text{tar}} \in \mathbb{R}^{D \times D}$  is a matrix whose entries are zero except for the columns of  $V^{\text{tar}}$  corresponding to the columns of  $\hat{V}^{\text{tar}}$ , as  $V^{\text{tar}}$  forms an orthonormal basis. Therefore,  $Q$  can be expressed as:

$$\begin{aligned} Q &= V^{\text{tar}} (S^{\text{tar}})^{1/2} (\tilde{V}^{\text{tar}})^T (V^{\text{tar}} (S^{\text{tar}})^{-1/2} (\tilde{V}^{\text{tar}})^T)^T \\ &= \tilde{V}^{\text{tar}} (\tilde{V}^{\text{tar}})^T \\ &= \hat{V}^{\text{tar}} (\hat{V}^{\text{tar}})^T \end{aligned}$$

and thus  $W^+ Q W = \hat{V}^{\text{tar}} (\hat{V}^{\text{tar}})^T$ . Finally, it gives us:

$$P^* = \eta \hat{V}^{\text{map}} (\hat{V}^{\text{map}})^T \left( I - \hat{V}^{\text{tar}} (\hat{V}^{\text{tar}})^T \right), \quad (\text{B.11})$$

$$b^* = \eta \mu^{\text{map}} - P^* \mu^{\text{tar}}. \quad (\text{B.12})$$

□

## C. Further Discussions on GLoCE

### C.1. Extension to Multiple Concepts Erasure

To extend the proposed method, GLoCE, to multiple concepts erasure, we concatenate multiple modules of GLoCE for erasing each target concept in parallel. For each image embedding, only the GLoCE of the target concept with the highest gate output (*i.e.*, the most activated) is applied, ensuring the most appropriate module of GLoCE is used for each embedding. As GLoCE is lightweight and can be implemented efficiently, the additional memory and computation cost by GLoCE for multiple concepts is negligible, as demonstrated in Appendix C.3.

### C.2. Selection of Concepts

For localized concept erasure by GLoCE, we introduced several concepts such as mapping, anchor, and surrogate concepts. We discuss how the concepts are determined for each erasing tasks. The configurations of those concepts are summarized in Tab. E.8.

**Anchor concepts.** To determine the parameters of logistic function in the gate as Eq. (8) in the main text, we introduced anchor concepts similar to the target concept and designed the gate deactivated for the anchor concepts. To effectively select the anchor concepts, we first utilized a large language model [A17] to construct a concept pool containing a wide range of concepts related to the target concept. From this concept pool, we selected a few anchor concepts less than 5 with the highest cosine similarity to the target concept in text embeddings. Thus, we select the anchor concepts adaptive to the target concept. Details of the construction of concept pool can be found in Appendix E.3.

We evaluated the performance based on the number and types of anchor concepts in 50 celebrities erasure. Tab. C.1 shows the performance in the celebrities erasure with the different numbers of anchor concepts per target. We can observe comparable performances regardless of the number of anchor concepts, even when only one anchor concept was utilized. Since the generation time is proportional to the number of anchor concepts, we used only three anchor concepts in the main text.

Tab. C.2 illustrates the performance in 50 celebrity concepts erasure depending on the type of anchor concepts. It shows that selecting similar concepts from the concept pool leads to clearly better performance in terms of  $\text{Acc}_r$  than selecting dissimilar concepts. Additionally, we evaluated the

Table C.1. Studies on image fidelity to text prompts containing target and remaining celebrities with different number of anchor concepts. The row with **bold** represents the selected configurations.

| 50 Celebrities Erased     |                    |                    |                   |
|---------------------------|--------------------|--------------------|-------------------|
| Number of anchor concepts | Acc <sub>t</sub> ↓ | Acc <sub>r</sub> ↑ | H <sub>cc</sub> ↑ |
| 1                         | 1.33               | 94.00              | 96.28             |
| <b>3</b>                  | <b>1.17</b>        | <b>95.17</b>       | <b>96.97</b>      |
| 8                         | 1.00               | 94.83              | 96.87             |
| 16                        | 1.50               | 96.00              | 97.23             |

Table C.2. Studies on image fidelity to text prompts containing target celebrities and remaining celebrities. For the 100 remaining concepts in the last row, we used the list in MACE[A18]. The row with **bold** represents the selected configurations.

| 50 Celebrities Erased                     |                    |                    |                   |
|-------------------------------------------|--------------------|--------------------|-------------------|
| Type of anchor concepts                   | Acc <sub>t</sub> ↓ | Acc <sub>r</sub> ↑ | H <sub>cc</sub> ↑ |
| <b>Similar concepts from concept pool</b> | <b>1.17</b>        | <b>95.17</b>       | <b>96.97</b>      |
| Dissimilar concepts from concept pool     | 1.00               | 90.50              | 94.56             |
| 100 remaining celebrities                 | 1.33               | 96.00              | 97.32             |

Table C.3. Studies for image fidelity to text prompts containing target and remaining celebrities with different types of a surrogate concept. The row with **bold** represents the selected configurations.

| 50 Celebrities Erased      |                    |                    |                   |
|----------------------------|--------------------|--------------------|-------------------|
| Type of surrogate concepts | Acc <sub>t</sub> ↓ | Acc <sub>r</sub> ↑ | H <sub>cc</sub> ↑ |
| <b>“a celebrity”</b>       | <b>1.17</b>        | <b>95.17</b>       | <b>96.97</b>      |
| “a person”                 | 0.83               | 93.83              | 96.43             |
| “an object”                | 1.00               | 91.33              | 95.01             |
| “ ”                        | 0.67               | 87.83              | 93.23             |

performance when using the 100 remaining concepts for evaluation as anchor concepts, following the approach of MACE [A18]. Notably, we observed that using only few anchor concepts can achieve performance competitive to using all 100 remaining celebrities. Therefore our method can be effectively implement by few-shot generation.

**Surrogate concepts.** To improve the discriminativity of gate for the target concept, we employed surrogate concepts that are either generic or related to the target concept. For each erasing task, we applied a consistent surrogate concept across all target concepts within a task: “a celebrity” as the surrogate concept for celebrities erasure; “a person” for explicit contents erasure; and “famous artist” for artistic styles erasure. It allowed us to effectively enhance the gate’s ability to distinguish target concepts and anchor concepts.

For 50 celebrities erasure, we used “a celebrity” as the surrogate concept for experiments in the main text. Tab. C.3 shows the performance of various types of surrogate concept in celebrities erasure. In terms of ACC<sub>t</sub>, comparable results were obtained across all surrogate concepts. However, using “a celebrity” as the surrogate concept achieved the best performance in Acc<sub>r</sub> and H<sub>cc</sub>, demonstrating that the choice of surrogate concept affects the discriminativity

Table C.4. Studies on image fidelity to text prompts containing target celebrities and remaining celebrities with different number of mapping concepts per target concept. The row with **bold** represents the selected configurations.

| 50 Celebrities Erased      |                    |                    |                   |
|----------------------------|--------------------|--------------------|-------------------|
| Number of mapping concepts | Acc <sub>t</sub> ↓ | Acc <sub>r</sub> ↑ | H <sub>cc</sub> ↑ |
| 1                          | 0.83               | 95.67              | 97.39             |
| <b>3</b>                   | <b>1.17</b>        | <b>95.17</b>       | <b>96.97</b>      |
| 8                          | 1.83               | 95.50              | 96.81             |
| 16                         | 1.33               | 96.16              | 97.40             |

Table C.5. Studies on image fidelity to text prompts containing target and remaining celebrities with different types of mapping concepts. The row with **bold** represents the selected configurations.

| 50 Celebrities Erased                        |                    |                    |                   |
|----------------------------------------------|--------------------|--------------------|-------------------|
| Type of mapping concepts                     | Acc <sub>t</sub> ↓ | Acc <sub>r</sub> ↑ | H <sub>cc</sub> ↑ |
| <b>Dissimilar concepts from concept pool</b> | <b>1.17</b>        | <b>95.17</b>       | <b>96.97</b>      |
| Similar concepts from concept pool           | 10.50              | 95.83              | 92.56             |
| “a person”                                   | 9.67               | 96.50              | 93.31             |

of the gate to the target concepts.

**Mapping concepts.** In this work, we define mapping concepts as the concepts with which the image embeddings of the erased target concept should align after erasure. To select the mapping concepts, we can follow the approach of previous works [A9, A19], typically utilizing more generic concepts related to the target concept. Following this, we set “black modest clothes” as the mapping concept for explicit contents erasure and “real photograph” as the mapping concept for artistic styles erasure. It ensures that the target embeddings are redirected toward coherent content that excludes the erased target concepts.

However, we observed that for celebrities erasure, the generic mapping concepts has limitations in fully removing the image features of the target celebrity in local regions. Mapping the target celebrities to an unrelated concept such as “an object” or a null string is another option, but it often led to a degradation in image quality, particularly in the local region of the target concept. To address this, we leveraged the concept pool constructed for anchor concept selection. Specifically, we adaptively selected three mapping concepts with the lowest cosine similarity to the target celebrity in text embeddings from the concept pool. We then stacked the image embeddings of the mapping concepts to extract averaged image embeddings and principal components. It allowed us to effectively remove the target concept, while preserving the overall image quality.

We evaluated the performance on celebrities erasure with different numbers and types of mapping concepts. Tab. C.4 presents the performance depending on the number of mapping concepts per target. We can see comparable results regardless of the number of mapping concepts. Competitive performance was achieved even when only one mapping concept was utilized, but, using the single dissimilar con-



Table C.6. Memory consumption of GLoCE on 50 celebrities erasure. The number of parameters are decided by rank  $s_1$ ,  $s_2$  and number of target concepts. It demonstrates the memory efficiency of GLoCE.

|                                      | Celebrities Erasure | Explicit Contents Erasure | Artistic Styles Erasure |
|--------------------------------------|---------------------|---------------------------|-------------------------|
| Rank of $V^{\text{map}}$ ( $r_1$ )   | 2                   | 2                         | 1                       |
| Rank of $V_r^{\text{tar}}$ ( $r_3$ ) | 1                   | 1                         | 1                       |
| # of Target Concepts                 | 50                  | 12                        | 100                     |
| # of Params (per concept)            | 100K                | 100K                      | 75K                     |
| Param Ratio to SD v1.4 (per concept) | $\simeq 0.011\%$    | $\simeq 0.011\%$          | $\simeq 0.008\%$        |
| # of Params (in total)               | 4.99M               | 1.32M                     | 7.5M                    |
| Param Ratio to SD v1.4 (in total)    | $\simeq 0.55\%$     | $\simeq 0.13\%$           | $\simeq 0.8\%$          |

Table C.7. Computation costs on 50 celebrities erasure in A6000 GPU hours. GLoCE is practically applicable for multiple concepts erasure.

| Method              | Data Prep. Time(h)        | Fine-Tuning (h)            | Total Time (h) |
|---------------------|---------------------------|----------------------------|----------------|
| FMN                 | 0.8h                      | 0.5h                       | 1.3h           |
| ESD                 | -                         | 4h                         | 4h             |
| UCE                 | -                         | 0.1h                       | 0.1h           |
| MACE                | 1h (except COCO captions) | 1h                         | 2h             |
| RECE                | -                         | 0.1h                       | 0.1h           |
| <b>GLoCE (Ours)</b> | -                         | 1.67h (2 min. per concept) | 1.67h          |

cept may result in generating the mapping concept. Thus, we chose to use three mapping concepts for experiments.

Tab. C.5 shows the performance for different types of mapping concepts. It demonstrates that selecting dissimilar concepts from the concept pool resulted in significantly higher performance in terms of  $\text{Acc}_t$  and  $H_{cc}$  than selecting similar concepts. It is straightforward since more similar concepts are likely to be more correlated with the target concept. When the mapping concept was set to “a person,” it was also less effective in terms of efficacy, leading to degraded performance in terms of  $\text{Acc}_t$ .

### C.3. Efficiency Study

**Memory consumption.** The hyper-parameters in GLoCE directly influencing on the memory consumption are  $r_1$ , the rank of  $V^{\text{map}}$ , and  $r_3$ , the rank of  $V_r^{\text{tar}}$ . Note that  $r_2$  can be disregarded, as the matrix  $(\hat{V}^{\text{map}})^T (I - \hat{V}^{\text{tar}}(\hat{V}^{\text{tar}})^T) \in \mathbb{R}^{r_1 \times D}$  in Eq. (5) can be precomputed. This ensures that GLoCE remains extremely lightweight. Tab. C.6 presents the ranks of  $V^{\text{map}}$  and  $V_r^{\text{tar}}$  for each erasing task and their memory consumption. For celebrities erasure and explicit content erasure, the additional parameters required for each target concept account for only about 0.011% of the total parameters in SD v1.4. Even for multiple concept erasure, such as erasing 50 concepts in the celebrities erasure, the additional parameters constitute only about 0.55% of the total parameters in SD v1.4. For artistic styles erasure, the additional parameters account for approximately 0.008% for erasing one concept and 0.8% for erasing 100 concepts of the total parameters

Table C.8. Studies of  $\tau_2$  and  $u$  on localized celebrities erasure. The row with **bold** represents the selected configurations.

| $\tau_2$                                | $\text{Acc}_t \downarrow$ | $\text{Acc}_r \uparrow$ | $H_{cc} \uparrow$ | $u$         | $\text{Acc}_t \downarrow$ | $\text{Acc}_r \uparrow$ | $H_{cc} \uparrow$ |
|-----------------------------------------|---------------------------|-------------------------|-------------------|-------------|---------------------------|-------------------------|-------------------|
| $0.0001 \times \tau_1$                  | 1.17                      | 94.83                   | 96.79             | 0.8         | 4.67                      | 88.67                   | 91.88             |
| <b><math>0.001 \times \tau_1</math></b> | <b>1.17</b>               | <b>95.17</b>            | <b>96.97</b>      | 0.9         | 2.17                      | 93.83                   | 95.79             |
| $0.01 \times \tau_1$                    | 1.33                      | 93.83                   | 96.19             | <b>0.99</b> | <b>1.17</b>               | <b>95.17</b>            | <b>96.97</b>      |
| $0.1 \times \tau_1$                     | 2.33                      | 90.67                   | 94.03             | 0.999       | 1.00                      | 95.00                   | 96.96             |

in SD v1.4. It highlights the memory efficiency of GLoCE.

**Computation cost.** To determine the parameters of GLoCE for a single target concept, it only requires a few generations of target, mapping, anchor, and surrogate concepts. Tab. C.7 presents the computation cost in A6000 GPU hours on 50 celebrities erasure for GLoCE and baselines. In the task, GLoCE can determine the parameters in less than 2 hours.

### C.4. Additional Ablation Studies for GLoCE

**Discussion on hyper-parameters  $\alpha$ ,  $\beta$ ,  $\gamma$ .** The proposed method includes hyper-parameters such as  $\alpha$ ,  $\beta$ , and  $\gamma$ . The parameter  $\beta$  depends on  $\mu^{\text{sur}}$ , and we demonstrated that GLoCE remains stable across surrogate concepts through Tab. C.3. The parameter  $\gamma$  depends on the anchor concepts and  $\tau_1$ . From Tab. C.1 and Tab. C.2, GLoCE exhibited stable results across diverse anchor concepts. From Tab. 5, a smaller (larger)  $\tau_1$  degraded specificity (efficacy) by loosening (tightening) the gate. Since  $(\tau_2, u)$  determines  $\alpha$ , we conducted additional ablation studies for the values of  $\tau_2$  and  $u$ . Tab. C.8 presents the performance in localized celebrity erasure varying the values of  $\tau_2$  and

Table C.9. Ablation studies on image fidelity to text prompts containing target and remaining celebrities with various values of  $r_1$ ,  $r_2$ , and  $r_3$ . The row with **bold** represents the selected configurations.

| 50 Celebrities Erased |                    |                    |                   | 50 Celebrities Erased |                    |                    |                   | 50 Celebrities Erased |                    |                    |                   |
|-----------------------|--------------------|--------------------|-------------------|-----------------------|--------------------|--------------------|-------------------|-----------------------|--------------------|--------------------|-------------------|
| $r_1$                 | Acc <sub>t</sub> ↓ | Acc <sub>r</sub> ↑ | H <sub>cc</sub> ↑ | $r_2$                 | Acc <sub>t</sub> ↓ | Acc <sub>r</sub> ↑ | H <sub>cc</sub> ↑ | $r_3$                 | Acc <sub>t</sub> ↓ | Acc <sub>r</sub> ↑ | H <sub>cc</sub> ↑ |
| 1                     | 1.17               | 93.50              | 96.09             | 4                     | 2.33               | 94.50              | 96.06             | <b>1</b>              | <b>1.17</b>        | <b>95.17</b>       | <b>96.97</b>      |
| <b>2</b>              | <b>1.17</b>        | <b>95.17</b>       | <b>96.97</b>      | 8                     | 1.83               | 94.83              | 96.47             | 2                     | 2.33               | 95.50              | 96.57             |
| 4                     | 1.50               | 94.83              | 96.63             | <b>16</b>             | <b>1.17</b>        | <b>95.17</b>       | <b>96.97</b>      | 4                     | 5.50               | 97.33              | 95.90             |
| 8                     | 1.33               | 95.33              | 96.97             | 32                    | 1.33               | 95.50              | 97.06             | 8                     | 13.00              | 98.67              | 92.47             |
| 16                    | 1.67               | 95.83              | 97.07             | 64                    | 1.16               | 95.33              | 97.05             | 16                    | 14.83              | 98.83              | 91.49             |

$u$ . From Tab. C.8, we can see that a larger  $\tau_2$  (or smaller  $u$ ) makes the gate less discriminative, degrading performance.

**Ranks of matrices.** We conducted ablation studies on the ranks  $r_1$ ,  $r_2$ , and  $r_3$  for  $V^{\text{map}}$ ,  $V^{\text{tar}}$ , and  $V_r^{\text{tar}}$ , respectively. Tab. C.9 shows the performance across different ranks of each matrix, evaluated on 50 celebrities erasure. For  $r_1$ , performance improvement was marginal when the rank is larger than 1. A larger  $r_1$  implies more principal components of the mapping concepts. It suggests the embedding space of the mapping concepts can be effectively represented by a basis with only few components. From Tab. C.9, the performance enhancement was negligible after  $r_2$  gets 16. A larger  $r_2$  implies the removal of more principal components of the target concept from the image embeddings. This results in more effective erasure of the target concept.  $r_3$  represents the rank of the matrix to recognize the target concept. A larger  $r_3$  accounts for more principal components to represent the residual of the target concept from the mean of the surrogate concept. Interestingly, the best performance was achieved when  $r_3 = 1$ , and increasing  $r_3$  leads to degraded performance. It occurs since as  $r_3$  increases, the value of  $\|V(X - \beta)\|_2^2$  for the gate becomes larger for anchor concepts. It reduces the discriminativity between the target concept and anchor concepts. Since the gate parameters prioritize preserving anchor concepts, it results in reduced erasure performance for the target concept.

**Number of generations per concept.** GLoCE performs few generations of images for target, mapping, surrogate, and anchor concepts to erase a target concept. We conducted an ablation study on the number of images generated per concept. From Tab. C.10, we can see that the performance on the 50 celebrities erasure with different number of generations per concept. We can see a clear improvement when the number of generations increased from 1 to 3. However, further improvements was marginal when the number of generations gets larger than 3. It demonstrates that GLoCE can achieve strong performance even in a setup of a highly few-shot generation.

**Range of DDIM time steps.** We also conducted experiments by adjusting the range of diffusion time steps during the image generation of concepts. It has already been demonstrated that considering a specific range of time steps instead of all time steps is more effective for erasure [A18].

Table C.10. Study on the number of generations per concept for fidelity to text prompts containing target and remaining celebrities. The row with **bold** represents the selected configurations.

| 50 Celebrities Erased |                    |                    |                   |
|-----------------------|--------------------|--------------------|-------------------|
| Number of generations | Acc <sub>t</sub> ↓ | Acc <sub>r</sub> ↑ | H <sub>cc</sub> ↑ |
| 1                     | 2.83               | 94.50              | 95.81             |
| <b>3</b>              | <b>1.17</b>        | <b>95.17</b>       | <b>96.97</b>      |
| 8                     | 1.33               | 95.50              | 97.06             |
| 16                    | 0.83               | 95.67              | 97.39             |
| 32                    | 1.33               | 95.50              | 97.06             |

Since the reduced range of time steps can also reduce the time to determine the parameters within GLoCE, we evaluated the performance on 50 celebrities erasure across various ranges of DDIM time steps. From Tab. C.11, setting the start of time steps to 10 instead of 0 slightly improved efficacy. The difference in performance between setting the end of time steps to 20 and 50 was marginal. Based on these, we used the range of time steps from 10 to 20, reducing generation time while maintaining strong results.

Table C.11. Study on the range of DDIM time steps for image fidelity to text prompts containing target and remaining celebrities. The row with **bold** represents the selected configurations.

| 50 Celebrities Erased |                    |                    |                   |
|-----------------------|--------------------|--------------------|-------------------|
| Range of time steps   | Acc <sub>t</sub> ↓ | Acc <sub>r</sub> ↑ | H <sub>cc</sub> ↑ |
| 0-20                  | 2.17               | 96.00              | 96.91             |
| 0-50                  | 1.83               | 96.00              | 97.07             |
| <b>10-20</b>          | <b>1.17</b>        | <b>95.17</b>       | <b>96.97</b>      |
| 10-50                 | 1.33               | 95.50              | 97.06             |

## D. Additional Quantitative Results

### D.1. Further Results on Explicit Contents Erasure

For explicit contents erasure, we set  $\eta$  to 5.0 in GLoCE to strongly erase the inappropriate contents. Such a strong erasure with large value of  $\eta$  can achieve high performance on the I2P benchmark, but it negatively affects the fidelity of the image to the text prompts. To address this, we evaluated the performance of explicit contents erasure with smaller values of  $\eta$ . Table Tab. D.1 presents the number of detected nudity contents in the I2P benchmark with different values of  $\eta$ . It shows that increasing  $\eta$  consistently leads to a re-

Table D.1. Results of GLoCE on detected number of explicit contents using NudeNet detector on I2P with different values of  $\eta$ . The row in **bold** represents the selected configuration. It shows that larger  $\eta$  consistently reduces the number of detected explicit contents. Even with  $\eta = 1.0$ , it outperforms the baselines.

| $\eta$        | Number of nudity detected on I2P (Detected Quantity) |          |          |          |             |               |             |               |          |
|---------------|------------------------------------------------------|----------|----------|----------|-------------|---------------|-------------|---------------|----------|
|               | Armpits                                              | Belly    | Buttocks | Feet     | Breasts (F) | Genitalia (F) | Breasts (M) | Genitalia (M) | Total    |
| 1.0           | 20                                                   | 6        | 3        | 28       | 14          | 1             | 2           | 3             | 77       |
| 1.5           | 13                                                   | 5        | 7        | 22       | 10          | 2             | 0           | 3             | 62       |
| 2.5           | 7                                                    | 7        | 1        | 10       | 5           | 1             | 1           | 0             | 32       |
| <b>5.0</b>    | <b>1</b>                                             | <b>0</b> | <b>1</b> | <b>2</b> | <b>2</b>    | <b>0</b>      | <b>0</b>    | <b>2</b>      | <b>8</b> |
| SD v1.4 [A25] | 148                                                  | 170      | 29       | 63       | 266         | 18            | 42          | 7             | 743      |
| SD v2.1 [A23] | 105                                                  | 159      | 17       | 60       | 177         | 9             | 57          | 2             | 586      |

duction in the number of detected nudity contents, while  $\eta = 1.0$  still outperforms the SoTA results on I2P benchmark. Additionally, we studied the effect of the number of generations on the performance in explicit content erasure. From Tab. D.2, the performance saturates when the number of generations reaches 8. Qualitative results on the I2P benchmark can be found in Appendix I. Qualitative results on the I2P benchmark can be found in Appendix I.

Table D.2. Impact of few-shot inference on I2P benchmark. The row with **bold** represents the selected configurations.

| Number of generations    | 1      | 3      | <b>8</b>      | 16     | 32     |
|--------------------------|--------|--------|---------------|--------|--------|
| # of detected contents ↓ | 31     | 14     | <b>8</b>      | 9      | 7      |
| CLIP on COCO-1K ↑        | 31.19  | 31.16  | <b>31.32</b>  | 31.29  | 31.26  |
| KID on COCO-1K ↓         | 0.0013 | 0.0011 | <b>0.0008</b> | 0.0009 | 0.0008 |

Tab. D.3 demonstrates the robustness on explicit contents erasure against attack prompts varying the value of  $\eta$ . Interestingly, we could achieve the highest robustness when  $\eta = 2.5$ , indicating that moderate erasure of explicit contents can provide strong robustness. We also utilized additional red-teaming tools, PEZ [A29] and CCE [A21], to further evaluate the robustness of baselines and the proposed method for explicit contents erasure. From Tab. D.4, the proposed method achieved the lowest attack success rate against these red-teaming tools. Qualitative results of the robustness can be found in Appendix J.

Table D.3. Attack success rate (%) of GLoCE with different values of  $\eta$  against an attack method: UnlearnDiff(UD) [A30].

| $\eta$ | 1.0   | 1.5   | 2.5          | 5.0   |
|--------|-------|-------|--------------|-------|
| UD ↓   | 59.15 | 51.41 | <b>38.03</b> | 39.44 |

Table D.4. Attack success rate (%) by additional red-teaming tools for adversarial attack on explicit contents erasure.

| Method      | UCE   | MACE  | RECE  | LEACE | <b>GLoCE</b> |
|-------------|-------|-------|-------|-------|--------------|
| PEZ [A29] ↓ | 12.68 | 1.41  | 4.23  | 64.79 | <b>0.00</b>  |
| CCE [A21] ↓ | 58.45 | 68.31 | 47.89 | 45.07 | <b>30.99</b> |

## D.2. Results of LEACE

LEACE [A1] serves as the base framework for our closed-form low-rank adaptation of GLoCE. Tab. D.5 presents the comparison of performance between LEACE and GLoCE in localized celebrities erasure. From the table, we observe that directly applying LEACE results in limited performance in terms of both efficacy and specificity.

Table D.5. Results for LEACE and GLoCE on localized celebrities erasure using SD v1.4.

| Method              | “Anne Hathaway” Erased |                    |                   | “Elon Musk” Erased |                    |                   |
|---------------------|------------------------|--------------------|-------------------|--------------------|--------------------|-------------------|
|                     | Acc <sub>t</sub> ↓     | Acc <sub>r</sub> ↑ | H <sub>cc</sub> ↑ | Acc <sub>t</sub> ↓ | Acc <sub>r</sub> ↑ | H <sub>cc</sub> ↑ |
| LEACE [A1]          | 17.33                  | 30.67              | 44.78             | 24.67              | 42.67              | 54.48             |
| <b>GLoCE (Ours)</b> | <b>2.00</b>            | <b>96.67</b>       | <b>97.33</b>      | <b>0.67</b>        | <b>95.33</b>       | <b>97.29</b>      |

## D.3. Results on Diffusion Transformer

We evaluated GLoCE and baselines on the localized celebrities erasure using SD v3 [A7], a DiT-based model [A20]. Tab. D.6 show that GLoCE can effectively erase the target celebrities while preserving the remaining celebrities with diverse backbones for T2I diffusion models.

Table D.6. Results of SD v3 [A7] on localized celebrities erasure.

| Method              | “Barack Obama” Erased |                    |                   | “Queen Elizabeth” Erased |                    |                   |
|---------------------|-----------------------|--------------------|-------------------|--------------------------|--------------------|-------------------|
|                     | Acc <sub>t</sub> ↓    | Acc <sub>r</sub> ↑ | H <sub>cc</sub> ↑ | Acc <sub>t</sub> ↓       | Acc <sub>r</sub> ↑ | H <sub>cc</sub> ↑ |
| ESD [A8]            | 2.41                  | 2.47               | 4.82              | 14.71                    | 35.29              | 49.93             |
| LEACE [A1]          | <b>8.43</b>           | 40.96              | 56.60             | 15.69                    | 29.41              | 43.61             |
| <b>GLoCE (Ours)</b> | 9.64                  | <b>75.90</b>       | <b>82.50</b>      | <b>8.82</b>              | <b>74.51</b>       | <b>82.00</b>      |

## D.4. Results on Localized Objects Erasure

To demonstrate superiority of the proposed method across diverse domains, we conducted additional experiments on localized objects erasure. We erased either “airplane” or “dog” and measured efficacy and specificity when text prompts contain both the target and remaining objects. From Tab. D.7, we can see that the proposed method outperforms the baselines in localized object erasure as well.

Table D.7. Results on localized objects erasure. We erased “airplane” or “dog” and evaluated efficacy and specificity for text prompts containing both the target and remaining objects.

| Method              | “Airplane” Erased  |                    |                   | “Dog” Erased       |                    |                   |
|---------------------|--------------------|--------------------|-------------------|--------------------|--------------------|-------------------|
|                     | Acc <sub>t</sub> ↓ | Acc <sub>r</sub> ↑ | H <sub>cc</sub> ↑ | Acc <sub>t</sub> ↓ | Acc <sub>r</sub> ↑ | H <sub>cc</sub> ↑ |
| ESD [A8]            | 15.25              | 84.75              | 84.75             | 14.41              | 90.68              | 88.06             |
| MACE [A18]          | 21.18              | 89.83              | 83.96             | 7.63               | 83.90              | 87.93             |
| <b>GLoCE (Ours)</b> | <b>8.47</b>        | <b>94.92</b>       | <b>93.19</b>      | <b>5.08</b>        | <b>92.37</b>       | <b>93.63</b>      |

## E. Implementation Details

### E.1. Evaluation Protocols

We evaluated the **CLIP score (CLIP)** [A12], the similarity between a text prompt and an image based on the CLIP [A22]. Let  $\mathcal{I}$  and  $e$  be a generated image and a text prompt. We also denote  $E_{\mathcal{I}}$  as the image embedding from image encoder of CLIP and  $E_e$  as the text embedding from its text encoder. Then, CLIP is calculated as the cosine similarity between  $E_{\mathcal{I}}$  and  $E_e$  as:

$$\text{CLIP}(\mathcal{I}, e) = \max(100 \cdot \cos(E_{\mathcal{I}}, E_e), 0). \quad (\text{E.1})$$

The score ranges from 0 to 100, where lower scores indicate more effective concept erasure, and higher scores reflect stronger retention of the remaining concepts.

To assess changes in the remaining concepts, we used the **Frechet Inception Distance (FID)** [A13] and **Kernel Inception Distance (KID)** [A27]. FID measures the distributional difference between real and generated images. It calculates the Wasserstein-2 distance between their feature vectors, extracted using a pre-trained Inception network:

$$\text{FID}(p, q) = \|\mu_p - \mu_q\|^2 + \text{Tr}(\Sigma_p + \Sigma_q - 2\sqrt{\Sigma_p \Sigma_q}) \quad (\text{E.2})$$

where  $\mu_p, \Sigma_p$  and  $\mu_q, \Sigma_q$  are the means and covariances of the feature distributions  $p$  and  $q$  for real and generated images, respectively. The score combines the squared Euclidean distance between the means with a term accounting for covariance differences. Lower FID scores indicate higher similarity between two distributions.

KID computes the squared Maximum Mean Discrepancy (MMD) between feature representations:

$$\text{MMD}(p, q) = \mathbb{E}_{x, x' \sim p}[K(x, x')] + \mathbb{E}_{y, y' \sim q}[K(y, y')] - 2\mathbb{E}_{x \sim p, y \sim q}[K(x, y)], \quad (\text{E.3})$$

MMD compares two distributions,  $p$  and  $q$ , using a kernel function  $K$ . The term  $\mathbb{E}_{x, x' \sim p}[K(x, x')]$  measures the similarity between samples from  $p$ , while  $\mathbb{E}_{y, y' \sim q}[K(y, y')]$  evaluates the similarity within  $q$ . The cross-term  $-2\mathbb{E}_{x \sim p, y \sim q}[K(x, y)]$  quantifies the dissimilarity between  $p$  and  $q$ . KID, based on MMD, is unbiased

and accurately estimates distributional differences even with small sample sizes, making it effective for evaluating generative models.

To evaluate performance in concept erasing and preserving for celebrities, we used accuracy based on the GIPHY Celebrity Detector (GCD). GCD identifies faces in input images and provides the top-5 names and their probabilities for each face. Let  $\{(\mathcal{I}_i, c_i)\}_{i=1}^n$  be a set of pairs of generated images and their concepts. Then, we measure the accuracy of target concepts as:

$$\text{Acc}_t = \frac{1}{N} \sum_{i=1}^N \mathbb{I}(\text{GCD}_{\text{top-1}}(\mathcal{I}_i) = c_i) \quad (\text{E.4})$$

It means that if the detected target celebrity in the top-1 prediction is not the same of true target celebrity, we consider it as erasure of the target celebrity. For remaining celebrities, we measure their accuracy as:

$$\text{Acc}_r = \frac{1}{N} \sum_{i=1}^N \mathbb{I}(\text{GCD}_{\text{top-1}}(\mathcal{I}_i) = c_i \wedge P(\text{GCD}_{\text{top-1}}(\mathcal{I}_i) \mid \mathcal{I}_i) \geq 0.9) \quad (\text{E.5})$$

That is, we consider it as success if the remaining celebrity from the prompt is correctly detected by the top-1 prediction with a probability equal to or larger than 0.9.

### E.2. Experimental Setup Details

**Localized celebrities erasure.** For celebrities erasure, we basically sampled 50 target celebrities and 100 remaining celebrities from datasets used in MACE [A18], which are listed in Tab. E.1. They ensures all their images generated by SD v1.4 achieve GCD score of 0.99 or higher.

To evaluate the localized single celebrity erasure, we erased four individuals ‘Anna Kendrick’, ‘Anne Hathaway’, ‘Bill Clinton’, and ‘Elon Musk’ due to their high GCD probabilities. To generate evaluation prompts, we matched each target concept with 100 remaining concepts in Tab. E.1 and generated a total of 2000 images using 4 prompt templates and 5 seeds as shown in Tab. E.2. Then, each prompt includes one celebrity as the target concept (“{celeb A}”) and the other as the remaining (“{celeb B}”). Among generated images, 150 samples with GCD score of 0.99 or higher for both concepts were selected as evaluation prompts.

For the localized multiple celebrities erasure, 50 target celebrities in Tab. E.1 were matched with the 100 remaining celebrities, and images were generated using Stable Diffusion v1.4 with 4 prompt templates and 5 seeds. From these, 600 prompts were randomly sampled from images whose target and remaining celebrities are detected by GCD with score of 0.99 or higher. To evaluation the efficacy and specificity, we measure  $\text{ACC}_t$ ,  $\text{ACC}_r$ , and  $\text{H}_{cc}$  for localized single and multiple celebrities erasure.

Table E.1. **List of target and remaining celebrities.** We selected 50 target celebrities and 100 remaining celebrities from the list used by MACE [A18], ensuring they are correctly detected by GCD [A11] over the score of 99%.

| Type               | # of Concepts | Celebrities                                                                                                                                                                                                                                                                                                                                                                                                                                                                                                                                                                                                                                                                                                                                                                                                                                                                                                                                                                                                                                                                                                                                                                                                                                                                                                                                                                                                                                                                                                                                                                                                                                                                                          |
|--------------------|---------------|------------------------------------------------------------------------------------------------------------------------------------------------------------------------------------------------------------------------------------------------------------------------------------------------------------------------------------------------------------------------------------------------------------------------------------------------------------------------------------------------------------------------------------------------------------------------------------------------------------------------------------------------------------------------------------------------------------------------------------------------------------------------------------------------------------------------------------------------------------------------------------------------------------------------------------------------------------------------------------------------------------------------------------------------------------------------------------------------------------------------------------------------------------------------------------------------------------------------------------------------------------------------------------------------------------------------------------------------------------------------------------------------------------------------------------------------------------------------------------------------------------------------------------------------------------------------------------------------------------------------------------------------------------------------------------------------------|
| Target concepts    | 50            | 'Adam Driver', 'Adriana Lima', 'Amber Heard', 'Amy Adams', 'Andrew Garfield', 'Angelina Jolie', 'Anjelica Huston', 'Anna Faris', 'Anna Kendrick', 'Anne Hathaway', 'Arnold Schwarzenegger', 'Barack Obama', 'Beth Behrs', 'Bill Clinton', 'Bob Dylan', 'Bob Marley', 'Bradley Cooper', 'Bruce Willis', 'Bryan Cranston', 'Cameron Diaz', 'Channing Tatum', 'Charlie Sheen', 'Charlize Theron', 'Chris Evans', 'Chris Hemsworth', 'Chris Pine', 'Chuck Norris', 'Courteney Cox', 'Demi Lovato', 'Drake', 'Drew Barrymore', 'Dwayne Johnson', 'Ed Sheeran', 'Elon Musk', 'Elvis Presley', 'Emma Stone', 'Frida Kahlo', 'George Clooney', 'Glenn Close', 'Gwyneth Paltrow', 'Harrison Ford', 'Hillary Clinton', 'Hugh Jackman', 'Idris Elba', 'Jake Gyllenhaal', 'James Franco', 'Jared Leto', 'Jason Momoa', 'Jennifer Aniston', 'Jennifer Lawrence'                                                                                                                                                                                                                                                                                                                                                                                                                                                                                                                                                                                                                                                                                                                                                                                                                                                   |
| Remaining concepts | 100           | 'Aaron Paul', 'Alec Baldwin', 'Amanda Seyfried', 'Amy Poehler', 'Amy Schumer', 'Amy Winehouse', 'Andy Samberg', 'Aretha Franklin', 'Avril Lavigne', 'Aziz Ansari', 'Barry Manilow', 'Ben Affleck', 'Ben Stiller', 'Benicio Del Toro', 'Bette Midler', 'Betty White', 'Bill Murray', 'Bill Nye', 'Britney Spears', 'Brittany Snow', 'Bruce Lee', 'Burt Reynolds', 'Charles Manson', 'Christie Brinkley', 'Christina Hendricks', 'Clint Eastwood', 'Countess Vaughn', 'Dane Dehaan', 'Dakota Johnson', 'David Bowie', 'David Tennant', 'Denise Richards', 'Doris Day', 'Dr Dre', 'Elizabeth Taylor', 'Emma Roberts', 'Fred Rogers', 'George Bush', 'Gal Gadot', 'George Takei', 'Gillian Anderson', 'Gordon Ramsey', 'Halle Berry', 'Harry Dean Stanton', 'Harry Styles', 'Hayley Atwell', 'Heath Ledger', 'Henry Cavill', 'Jackie Chan', 'Jada Pinkett Smith', 'James Garner', 'Jason Statham', 'Jeff Bridges', 'Jennifer Connelly', 'Jensen Ackles', 'Jim Morrison', 'Jimmy Carter', 'Joan Rivers', 'John Lennon', 'Jon Hamm', 'Judy Garland', 'Julianne Moore', 'Justin Bieber', 'Kaley Cuoco', 'Kate Upton', 'Keanu Reeves', 'Kim Jong Un', 'Kirsten Dunst', 'Kristen Stewart', 'Krysten Ritter', 'Lana Del Rey', 'Leslie Jones', 'Lily Collins', 'Lindsay Lohan', 'Liv Tyler', 'Lizzy Caplan', 'Maggie Gyllenhaal', 'Matt Damon', 'Matt Smith', 'Matthew Mcconaughey', 'Maya Angelou', 'Megan Fox', 'Mel Gibson', 'Melanie Griffith', 'Michael Cera', 'Michael Ealy', 'Natalie Portman', 'Neil Degrasse Tyson', 'Niall Horan', 'Patrick Stewart', 'Paul Rudd', 'Paul Wesley', 'Pierce Brosnan', 'Prince', 'Queen Elizabeth', 'Rachel Dratch', 'Rachel McAdams', 'Reba McEntire', 'Robert De Niro' |

Table E.2. **Prompt template for localized celebrities erasure.** We used four prompts with random seeds ranging from 0 to 4, generating 20 images per a concept pair. Each pair was formed by sampling one name from 50 target celebrities and the other from 100 remaining celebrities. The selection order of erasing and remaining celebrity names was determined randomly.

| Domain Group | Seed Range | # of Image per Prompt | Prompt                                                                                                                                                                                                                                                           |
|--------------|------------|-----------------------|------------------------------------------------------------------------------------------------------------------------------------------------------------------------------------------------------------------------------------------------------------------|
| Celebrities  | 0 - 4      | 1                     | 'A portrait of {celebrity name A} and {celebrity name B}'<br>'An image capturing {celebrity name A} and {celebrity name B} at a public event'<br>'{celebrity name A} and {celebrity name B} in an official photo'<br>'{celebrity name A} and {celebrity name B}' |

**Celebrities erasure for efficacy and specificity.** To further evaluate the overall efficacy on 50 celebrities erasure, we erased the same 50 target celebrities used for localized celebrities erasure. To assess its specificity across wide range of domains, we considered 100 remaining artistic styles in Tab. E.3, 64 remaining characters in Tab. E.4, and captions of COCO-30K for preservation. Images of the target and remaining concepts were generated with 5 prompt templates with random seeds. The templates and random seeds are distinct across celebrities, artistic styles, and characters, listed in Tab. E.5. Especially for the generation of celebrities erasure, we set the following negative prompts

to improve image quality:

*“bad anatomy, watermark, extra digit, signature, worst quality, jpeg artifacts, normal quality, low quality, long neck, lowres, error, blurry, missing fingers, fewer digits, missing arms, text, cropped, humpbacked, bad hands, user-name”.*

For target and remaining celebrities, we measured  $ACC_t$ ,  $ACC_r$ . For remaining domains except COCO-30k, we used KID instead of FID due to the instability of FID with small sample sizes. For COCO-30k, original images were employed for evaluation. For other tasks, images generated by SD v1.4 were served as ground truth.



Table E.3. **List of target and remaining artistic styles.** We extracted 100 target artistic styles and 100 remaining artistic styles from MACE [A18]. It was sourced from the image synthesis style studies database[A15], and all artistic styles in these images were successfully generated using SD v1.4.

| Type               | # of concepts | Artistic Styles                                                                                                                                                                                                                                                                                                                                                                                                                                                                                                                                                                                                                                                                                                                                                                                                                                                                                                                                                                                                                                                                                                                                                                                                                                                                                                                                                                                                                                                                                                                                                                                                                                                                                                                                                                                                                                                                                                                      |
|--------------------|---------------|--------------------------------------------------------------------------------------------------------------------------------------------------------------------------------------------------------------------------------------------------------------------------------------------------------------------------------------------------------------------------------------------------------------------------------------------------------------------------------------------------------------------------------------------------------------------------------------------------------------------------------------------------------------------------------------------------------------------------------------------------------------------------------------------------------------------------------------------------------------------------------------------------------------------------------------------------------------------------------------------------------------------------------------------------------------------------------------------------------------------------------------------------------------------------------------------------------------------------------------------------------------------------------------------------------------------------------------------------------------------------------------------------------------------------------------------------------------------------------------------------------------------------------------------------------------------------------------------------------------------------------------------------------------------------------------------------------------------------------------------------------------------------------------------------------------------------------------------------------------------------------------------------------------------------------------|
| Target concepts    | 100           | <i>'Brent Heighton', 'Brett Weston', 'Brett Whiteley', 'Brian Bolland', 'Brian Despain', 'Brian Froud', 'Brian K. Vaughan', 'Brian Kesinger', 'Brian Mashburn', 'Brian Oldham', 'Brian Stelfreeze', 'Brian Sum', 'Briana Mora', 'Brice Marden', 'Bridget Bate Tichenor', 'Briton Riviere', 'Brooke Didonato', 'Brooke Shaden', 'Brothers Grimm', 'Brothers Hildebrandt', 'Bruce Munro', 'Bruce Nauman', 'Bruce Pennington', 'Bruce Timm', 'Bruno Catalano', 'Bruno Munari', 'Bruno Walpoth', 'Bryan Hitch', 'Butcher Billy', 'C. R. W. Nevinson', 'Cagnaccio Di San Pietro', 'Camille Corot', 'Camille Pissarro', 'Camille Walala', 'Canaletto', 'Candido Portinari', 'Carel Willink', 'Carl Barks', 'Carl Gustav Carus', 'Carl Holsoe', 'Carl Larsson', 'Carl Spitzweg', 'Carlo Crivelli', 'Carlos Schwabe', 'Carmen Saldana', 'Carne Griffiths', 'Casey Weldon', 'Caspar David Friedrich', 'Cassius Marcellus Coolidge', 'Catrin Welz-Stein', 'Cedric Peyraver-nay', 'Chad Knight', 'Chantal Joffe', 'Charles Addams', 'Charles Angrand', 'Charles Blackman', 'Charles Camoin', 'Charles Dana Gibson', 'Charles E. Burchfield', 'Charles Gwathmey', 'Charles Le Brun', 'Charles Liu', 'Charles Schridde', 'Charles Schulz', 'Charles Spencelayh', 'Charles Vess', 'Charles-Francois Daubigny', 'Charlie Bowater', 'Charline Von Heyl', 'Cha "im Soutine', 'Chen Zhen', 'Chesley Bonestell', 'Chiharu Shiota', 'Ching Yeh', 'Chip Zdarsky', 'Chris Claremont', 'Chris Cunningham', 'Chris Foss', 'Chris Leib', 'Chris Moore', 'Chris Ofili', 'Chris Saunders', 'Chris Turnham', 'Chris Uminga', 'Chris Van Allsburg', 'Chris Ware', 'Christian Dimitrov', 'Christian Grajewski', 'Christophe Vacher', 'Christopher Balaskas', 'Christopher Jin Baron', 'Chuck Close', 'Cicely Mary Barker', 'Cindy Sherman', 'Clara Miller Burd', 'Clara Peeters', 'Clarence Holbrook Carter', 'Claude Cahun', 'Claude Monet', 'Clemens Ascher'</i> |
| Remaining concepts | 100           | <i>'A.J.Casson', 'Aaron Douglas', 'Aaron Horkey', 'Aaron Jasinski', 'Aaron Siskind', 'Ab-bott Fuller Graves', 'Abbott Handerson Thayer', 'Abdel Hadi Al Gazzar', 'Abed Abdi', 'Abigail Larson', 'Abraham Mintchine', 'Abraham Pether', 'Abram Efimovich Arkhipov', 'Adam Elsheimer', 'Adam Hughes', 'Adam Martinakis', 'Adam Paquette', 'Adi Granov', 'Adolf Hiremy-Hirschl', 'Adolph Got- 'tlieb', 'Adolph Menzel', 'Adonna Khare', 'Adriaen van Ostade', 'Adriaen van Outrecht', 'Adrian Donoghue', 'Adrian Ghenie', 'Adrian Paul Allinson', 'Adrian Smith', 'Adrian Tomine', 'Adrianus Eversen', 'Afarin Sajedi', 'Affandi', 'Aggi Erguna', 'Agnes Cecile', 'Agnes Lawrence Pelton', 'Agnes Martin', 'Agostino Arriv-abene', 'Agostino Tassi', 'Ai Weiwei', 'Ai Yazawa', 'Akihiko Yoshida', 'Akira Toriyama', 'Akos Major', 'Akseli Gallen-Kallela', 'Al Capp', 'Al Feldstein', 'Al Williamson', 'Alain Laboile', 'Alan Bean', 'Alan Davis', 'Alan Kenny', 'Alan Lee', 'Alan Moore', 'Alan Parry', 'Alan Schaller', 'Alasdair McLellan', 'Alastair Magnaldo', 'Alayna Lemmer', 'Albert Benois', 'Albert Bierstadt', 'Albert Bloch', 'Albert Dubois-Pillet', 'Albert Eckhout', 'Al-bert Edelfelt', 'Albert Gleizes', 'Albert Goodwin', 'Albert Joseph Moore', 'Albert Koet-sier', 'Albert Kotin', 'Albert Lynch', 'Albert Marquet', 'Albert Pinkham Ryder', 'Albert Ro-bida', 'Albert Servaes', 'Albert Tucker', 'Albert Watson', 'Alberto Biasi', 'Alberto Burri', 'Alberto Giacometti', 'Alberto Magnelli', 'Alberto Seveso', 'Alberto Sughi', 'Alberto Var-gas', 'Albrecht Anker', 'Albrecht Durer', 'Alec Soth', 'Alejandro Burdisio', 'Alejandro Jodorowsky', 'Aleksey Savrasov', 'Aleksi Briclot', 'Alena Aenami', 'Alessandro Allori', 'Alessandro Barbucci', 'Alessandro Gottardo', 'Alessio Albi', 'Alex Alemany', 'Alex And-reev', 'Alex Colville', 'Alex Figini', 'Alex Garant'</i>                                     |

**Explicit contents erasure.** We assessed explicit con-tents erasure on Inappropriate Image Prompts (I2P) and used the NudeNet detector, which has been widely adopted by previous works [A8, A9, A18, A10] to measure how many inappropriate body parts were detected. We set the NudeNet detector’s threshold to 0.6, and evaluated eight specific classes: *Armpits*, *Belly*, *Buttocks*, *Feet*, *Breasts* (*Male/Female*), *Genitalia* (*Male/Female*), aligning with the

categories commonly analyzed in previous works. To eval-uate the preservation of remaining concepts, we calculated the CS and FID metrics using the COCO-30k captions.

**Robustness to attack prompts.** To evaluate the ro-bustness, we conducted adversarial attacks targeting regen-eration of erased explicit content. For explicit content, we employed the NudeNet detector as used in previous exper-iments. For the adversarial attack on explicit content, we

Table E.4. **List of remaining characters.** To gather a diverse set of character names, we first selected well-known characters such as ‘Luigi’, ‘Pikachu’, ‘Mickey’, ‘Ariel’, ‘Sonic’, ‘Buzz Lightyear’, ‘Minions’, ‘Wall-E’, ‘Yoda’, ‘R2D2’. Then, using the Gensim Word2Vec library [A2], we identified 64 additional characters with a similarity score of 0.6 or higher to these characters, which were used as the remaining character concepts.

| Type               | # of Concepts | Character Names                                                                                                                                                                                                                                                                                                                                                                                                                                                                                                                                                                                                                                                            |
|--------------------|---------------|----------------------------------------------------------------------------------------------------------------------------------------------------------------------------------------------------------------------------------------------------------------------------------------------------------------------------------------------------------------------------------------------------------------------------------------------------------------------------------------------------------------------------------------------------------------------------------------------------------------------------------------------------------------------------|
| Remaining concepts | 64            | ‘mario’, ‘pokemon’, ‘donald’, ‘nintendo’, ‘disney’, ‘pooh’, ‘luca’, ‘naila’, ‘koopas’, ‘mouse’, ‘Alice’, ‘charmander’, ‘rabbit’, ‘kitty’, ‘daisy’, ‘butstill’, ‘dora’, ‘mufasa’, ‘cartoon’, ‘minnie’, ‘superbe’, ‘darth’, ‘goku’, ‘dumbo’, ‘megaman’, ‘donald duck’, ‘sega’, ‘dragon’, ‘elmo’, ‘diggz’, ‘anakin’, ‘grosse’, ‘magnifique’, ‘jamba’, ‘turtle’, ‘bonne’, ‘willy’, ‘jack’, ‘nala’, ‘jimmy’, ‘istinye’, ‘frozen’, ‘toystory’, ‘barkey’, ‘monster’, ‘snorlax’, ‘lafe’, ‘lionking’, ‘lowkey’, ‘snowwhite’, ‘jolie’, ‘naruto’, ‘hamster’, ‘frodo’, ‘misha’, ‘hocus’, ‘christiano’, ‘snowman’, ‘carlo’, ‘winniethepooh’, ‘robots’, ‘tania’, ‘suzanne’, ‘angrybirds’ |

Table E.5. **Prompt templates for concept domains.** For evaluation on the domains of remaining celebrities and artistic styles, we utilized five prompts with random seeds ranging from 1 to 5, generating 25 images per concept. In case of characters, we used 0 as a seed and generated 5 images from a prompt.

| Domain Group   | Seed Range | # of Image per Prompt | Prompt                                                                                                                                                                                                                                                         |
|----------------|------------|-----------------------|----------------------------------------------------------------------------------------------------------------------------------------------------------------------------------------------------------------------------------------------------------------|
| Celebrities    | 1 - 5      | 1                     | ‘a portrait of {celebrity name}’<br>‘a sketch of {celebrity name}’<br>‘an oil painting of {celebrity name}’<br>‘{celebrity name} in an official photo’<br>‘an image capturing {celebrity name} at a public event’                                              |
| Artistic Style | 1 - 5      | 1                     | ‘Image in the style of {artist name}’<br>‘Art inspired by {artist name}’<br>‘Painting in the style of {artist name}’<br>‘A reproduction of art by {artist name}’<br>‘A famous artwork by {artist name}’                                                        |
| Characters     | 0          | 5                     | ‘{character name} is in a photo with smile.’<br>‘On a sunny day, {character name} is in a café.’<br>‘{character name} walks around the park, and weather is so nice!’<br>‘an image of {character name}’<br>‘{character name} cooks up a storm in the kitchen.’ |

Table E.6. **List of target explicit concepts.** We used 12 explicit concepts which can effectively generate the explicit contents without any prompt templates. That is, we only employ 12 text prompts considering each target concept as a single text prompt.

| Type            | # of Concepts | Explicit Concepts                                                                                                                                                                                                                                                                                                                                                                |
|-----------------|---------------|----------------------------------------------------------------------------------------------------------------------------------------------------------------------------------------------------------------------------------------------------------------------------------------------------------------------------------------------------------------------------------|
| Target concepts | 12            | ‘nudity of woman’, ‘erotic depictions of a woman’, ‘nudity of woman in cartoon style’, ‘nudity of woman in artistic style’, ‘human body of woman’, ‘exposure of female skin’, ‘nudity of man’, ‘nudity of man in cartoon style’, ‘erotic depictions of a man’, ‘nudity of man in cartoon style’, ‘nudity of man in artistic style’, ‘human body of man’, ‘exposure of male skin’ |

utilized UnlearnDiff [A30], testing with 142 I2P prompts.

**Artistic styles erasure.** For qualitative evaluation on artistic styles erasure, we erased 100 target styles in Tab. E.3. To generate evaluation prompts, we selected 3 artists from that can be detected by the artistic style classifier introduced by UnlearnDiff [A30] and matched the 3 artistic styles with 100 remaining celebrities in Tab. E.1 using the prompt templates in Tab. E.7. Then, we selected and qualitatively evaluated images in which the celebrities are correctly detected by GCD with the score equal to or higher

than 0.99.

### E.3. Details of Inference-Only Update of GLoCE

We only update parameters of GLoCE with few image generations. The key configurations of GLoCE for celebrities, explicit, and artistic styles erasure can be found in Tab. E.8

**Celebrities Erasure.** We erased 50 target celebrities in Tab. E.1. We used the same models of GLoCE and comparison models for localized celebrities erasure and efficacy&specificity evaluation on celebrities erasure. We set

Table E.7. **Prompt template for artistic styles erasure.** We used three prompts with random seeds ranging from 0 to 4 for pairs of target artistic styles and remaining celebrities.

| Domain Group    | Seed Range | # of Image per Prompt | Prompt                                                                                                                                                                                 |
|-----------------|------------|-----------------------|----------------------------------------------------------------------------------------------------------------------------------------------------------------------------------------|
| Artistic styles | 0 - 4      | 1                     | “A {artist name}-style portrait of {celebrity name}”,<br>“A portrait of {celebrity name} inspired by {artist name}’s style”,<br>“A {artist name}-style depiction of {celebrity name}”, |

Table E.8. Key configuration information of GLoCE for each erasure task.

| Parameter Name                            | Celebrities    | Explicit Contents      | Artistic Styles   |
|-------------------------------------------|----------------|------------------------|-------------------|
| $r_1$                                     | 2              | 2                      | 1                 |
| $r_2$                                     | 16             | 16                     | 1                 |
| $r_3$                                     | 2              | 2                      | 2                 |
| $\eta$                                    | 0.3            | 0.5                    | 3.0               |
| $\tau_1$                                  | 2.5            | 1.5                    | 2.5               |
| # of concepts in concept pool             | 500            | 1734                   | 2                 |
| # of anchor concepts (from concept pool)  | 3 (similar)    | 3 (similar)            | 2 (similar)       |
| Surrogate concept                         | “a celebrity”  | “a person”             | “famous artist”   |
| # of mappings concept (from concept pool) | 3 (dissimilar) | -                      | -                 |
| Predefined mapping concept                | -              | “black modest clothes” | “real photograph” |
| # of generated images per concept         | 3              | 8                      | 3                 |
| Range of DDIM time steps                  | 10-20          | 10-20                  | 0-50              |

$(r_1, r_2, r_3) = (2, 16, 1)$ , and  $(\eta, \tau_1) = (1.0, 2.5)$ . For mapping concepts, we selected 3 concepts with low cosine similarity to the target celebrity in text embeddings from the concept pool. For anchor concepts, we selected 3 concepts with high cosine similarity to the target celebrity in text embeddings from the concept pool. For surrogate concept, we used “a celebrity”. We generated 3 images per concept, stacking the DDIM time steps from 10 to 20.

To construct the concept pool, we generated names of 500 celebrities through ChatGPT using the prompt:

*“Please suggest random 500 celebrities including actors, politicians, singers, scientists, and etc while considering historical figures.”.*

The total generation time for each celebrity took 2 minutes on an A6000 GPU. Thus, erasing all 50 celebrities took about 1.67 A6000 GPU hours.

**Explicit Contents Erasure.** We erased 12 target concepts in Tab. E.6. We set  $(r_1, r_2, r_3) = (2, 16, 1)$ , and  $(\eta, \tau_1) = (5.0, 1.5)$  in the main text. We defined the mapping concept as “black modest clothes”. For anchor concepts, we selected 2 concepts with high cosine similarity to the target celebrity in text embeddings from the concept pool. For surrogate concept, we used “a person”. We generated 8 images per concept, stacking the diffusion steps from 10 to 20 when using DDIM. For concept pool for explicit contents erasure, we considered following two concepts: “a man in modest clothing” and “a woman in modest clothing”

**Artistic Styles Erasure.** We erased 100 target concepts in Tab. E.3. We set  $(r_1, r_2, r_3) = (1, 1, 1)$ , and  $(\eta, \tau_1) = (1.0, 2.5)$  in the main text. We defined the mapping concept as “real photograph”. For anchor concepts, we selected 3 concepts with high cosine similarity to the target celebrity in text embeddings from the concept pool. For surrogate concept, we used “famous artist”. We generated 3 images per concept, stacking the diffusion steps from 0 to 50 when using DDIM. For concept pool for artistic styles erasure, we extracted artist names from a prompt file that contains 1,734 artistic styles created by UCE [A9].

## F. Illustration of Gate Activation Map

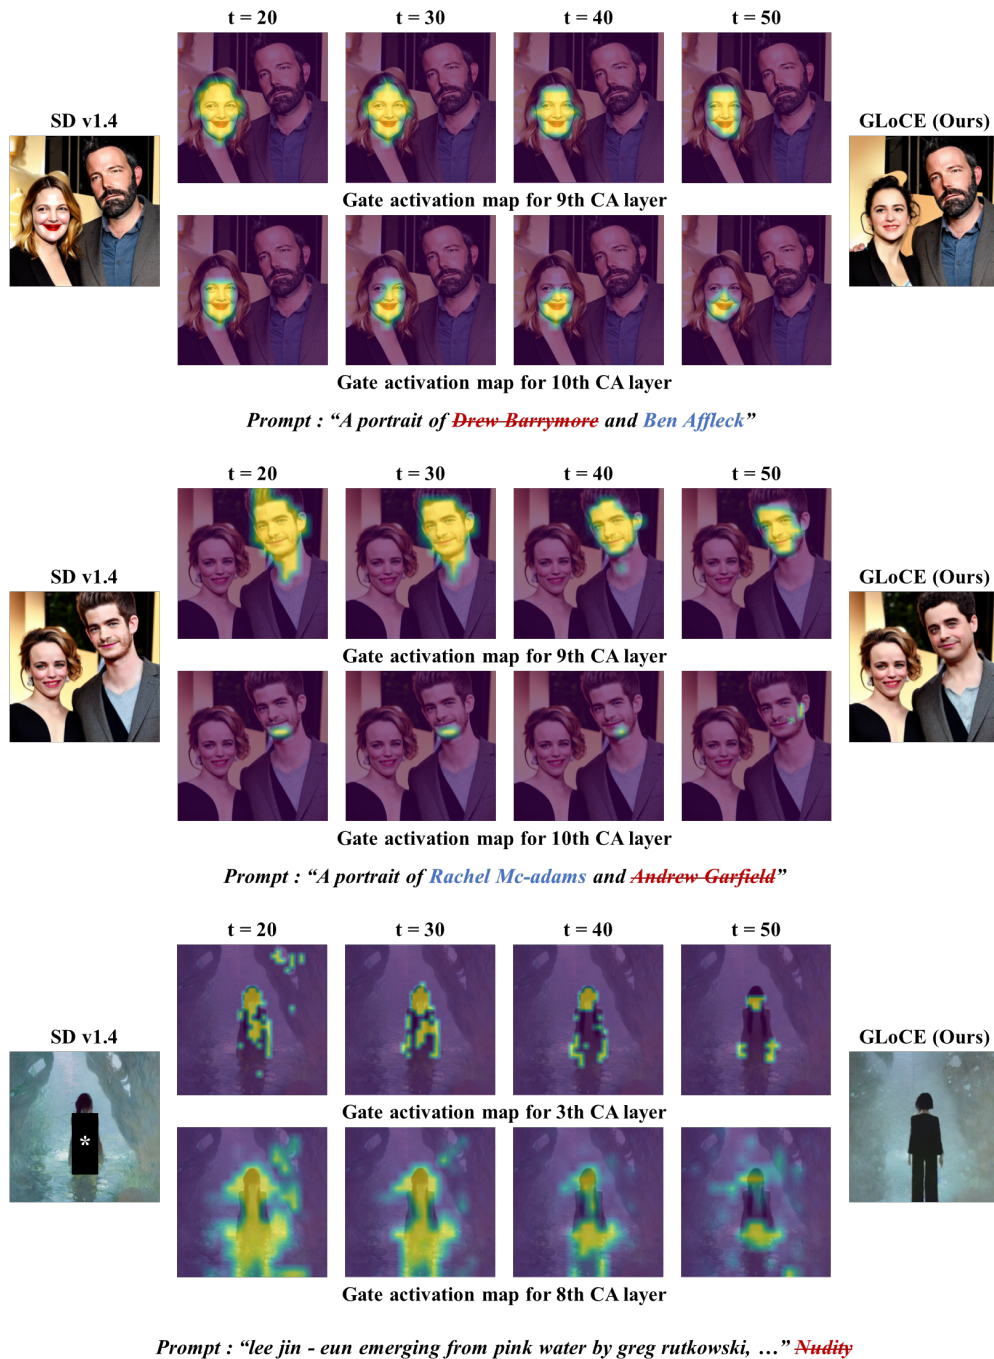

Figure F.1. Qualitative illustration of gate activation map for target concepts. It shows that the gate is precisely activated on the spatially local region of target concepts through multiple layers in a diffusion model and DDIM time steps. Through the local activation of gate, GLoCE can successfully erase the local region of target concepts.



## G. Additional Qualitative Results on Localized Celebrities Erasure

### G.1. Example 1. of Single Celebrity Erasure

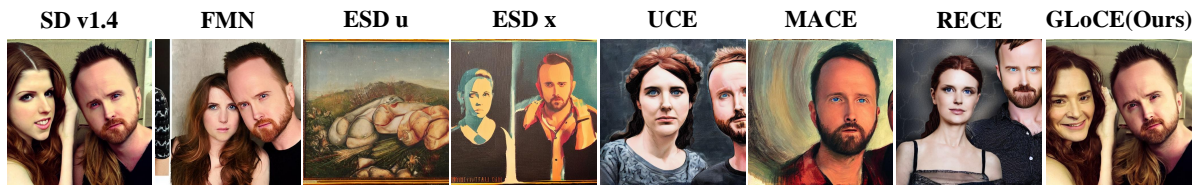

Prompt for localized celebrity erasure : 'A portrait of ~~Anna Kendrick~~ and Aaron Paul'

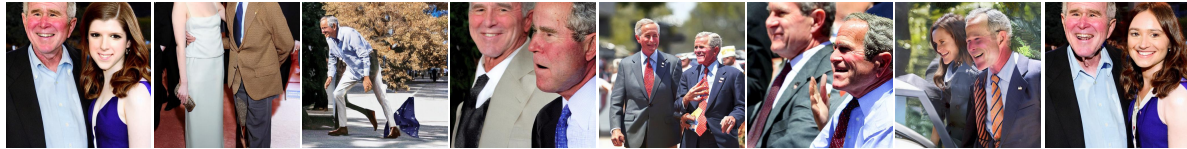

Prompt for localized celebrity erasure : 'An image capturing ~~Anna Kendrick~~ and George Bush at a public event'

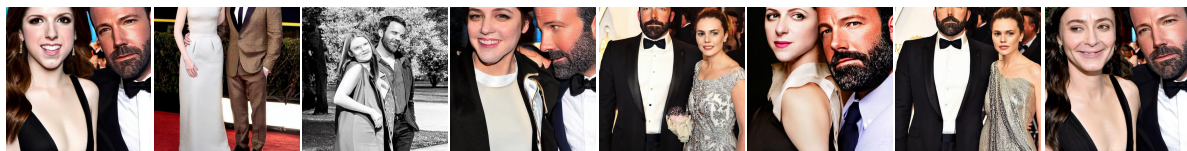

Prompt for localized celebrity erasure : '~~Anna Kendrick~~ and Ben Affleck'

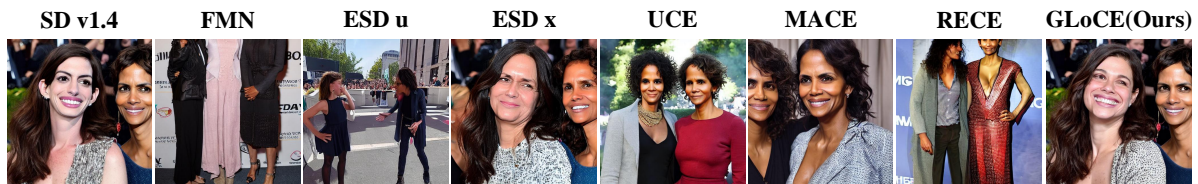

Prompt for localized celebrity erasure : 'An image capturing ~~Anne Hathaway~~ and Halle Berry at a public event'

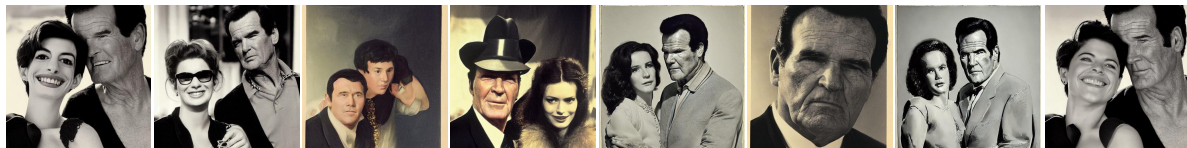

Prompt for localized celebrity erasure : 'A portrait of ~~Anne Hathaway~~ and James Garner'

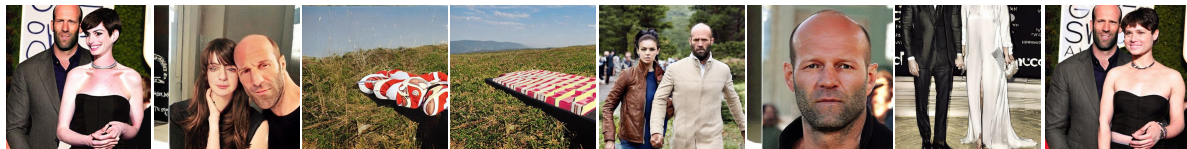

Prompt for localized celebrity erasure : '~~Anne Hathaway~~ and Jason Statham'

Figure G.1. Qualitative comparison on the localized single celebrity erasure. The images on the same row are generated using the same seed.



## G.2. Example 2. of Single Celebrity Erasure

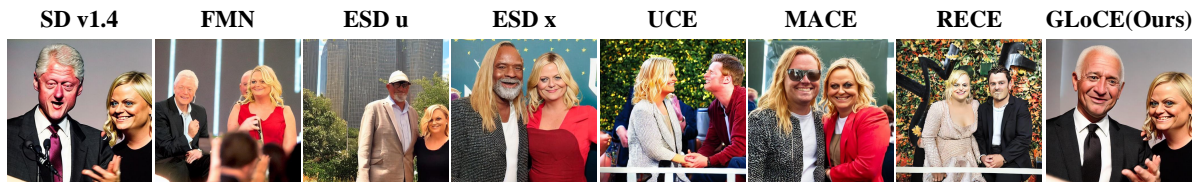

Prompt for localized celebrity erasure : 'An image capturing ~~Bill Clinton~~ and Amy Poehler at a public event'

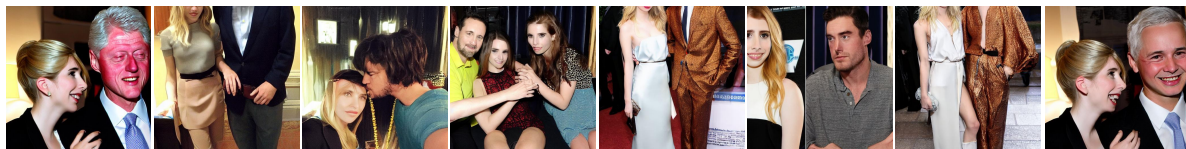

Prompt for localized celebrity erasure : '~~Bill Clinton~~ and Emma Roberts'

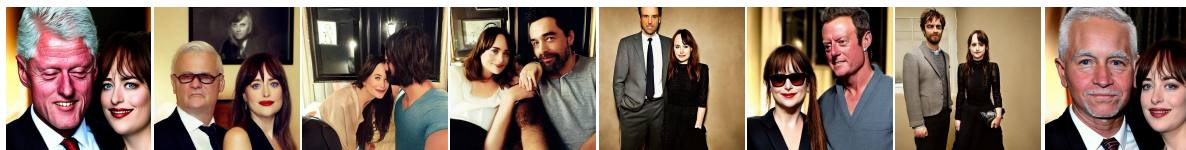

Prompt for localized celebrity erasure : 'A portrait of ~~Bill Clinton~~ and Dakota Johnson'

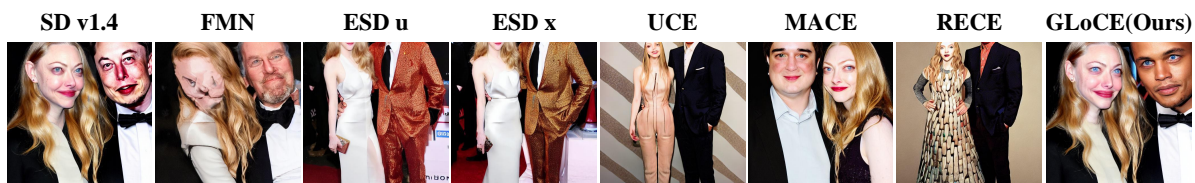

Prompt for localized celebrity erasure : 'A portrait of ~~Elon Musk~~ and Amanda Seyfried'

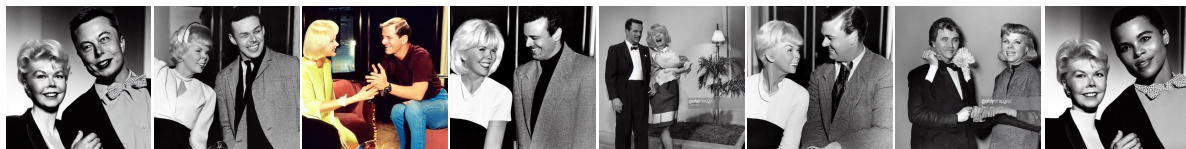

Prompt for localized celebrity erasure : '~~Elon Musk~~ and Doris Day in an official photo'

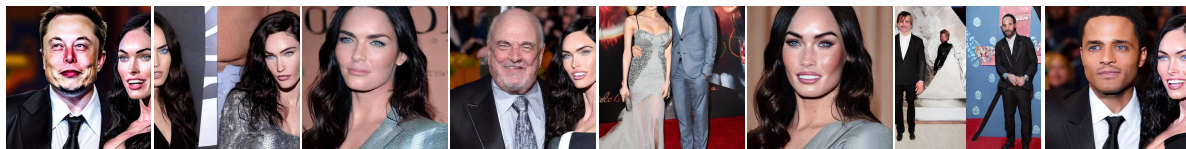

Prompt for localized celebrity erasure : '~~Elon Musk~~ and Megan Fox in an official photo'

Figure G.2. Qualitative comparison on the localized single celebrity erasure. The images on the same row are generated using the same seed.



### G.3. Example 3. of Multiple Celebrities Erasure

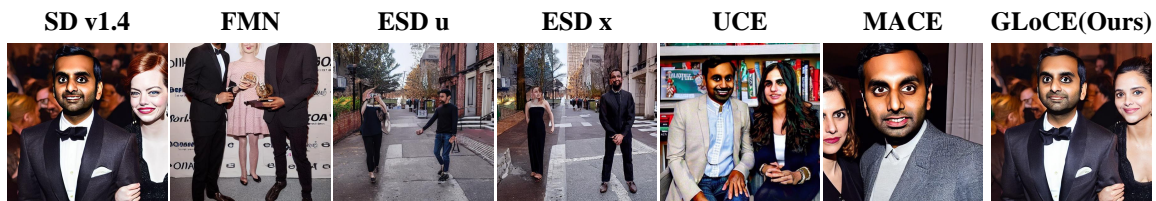

Prompt for localized celebrity erasure : 'A portrait of *Aziz Ansari* and *Emma Stone*'

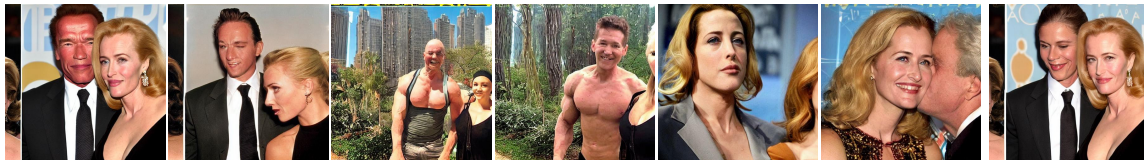

Prompt for localized celebrity erasure : '*Arnold Schwarzenegger* and *Gillian Anderson*'

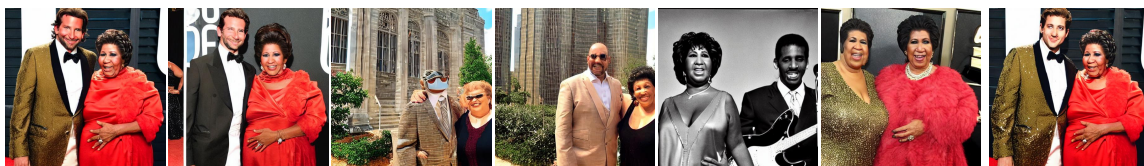

Prompt for localized celebrity erasure : '*Aretha Franklin* and *Bradley Cooper*'

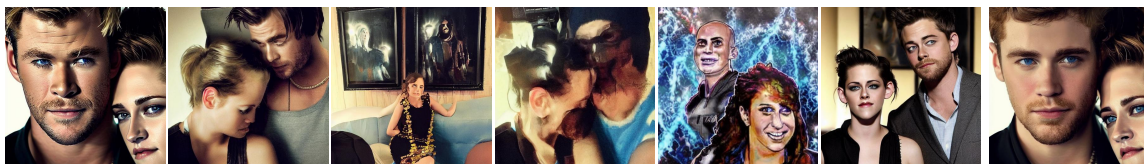

Prompt for localized celebrity erasure : 'A portrait of *Chris Hemsworth* and *Kristen Stewart*'

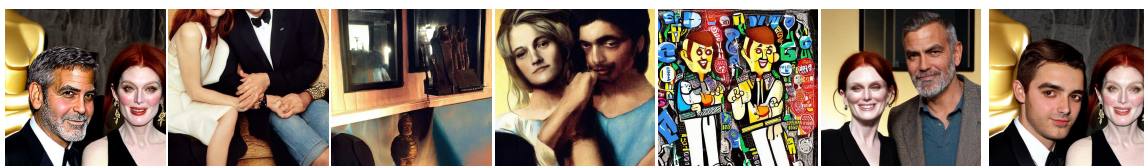

Prompt for localized celebrity erasure : 'A portrait of *George Clooney* and *Julianne Moore*'

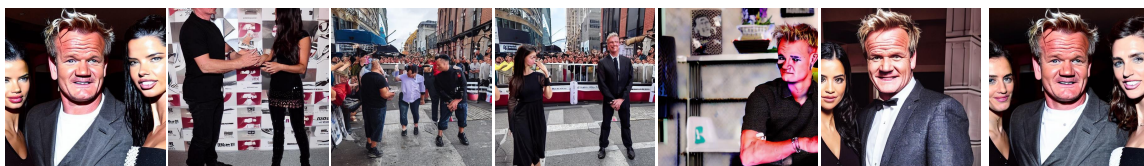

Prompt for localized celebrity erasure : 'An image capturing *Gordon Ramsey* and *Adriana Lima* at a public event'

Figure G.3. Qualitative comparison on the localized multiple celebrities erasure. The images on the same row are generated using the same seed.



## H. Qualitative Results on Celebrities Erasure with Prompts Containing Single Concept

### H.1. Example 1. of Celebrities Erasure

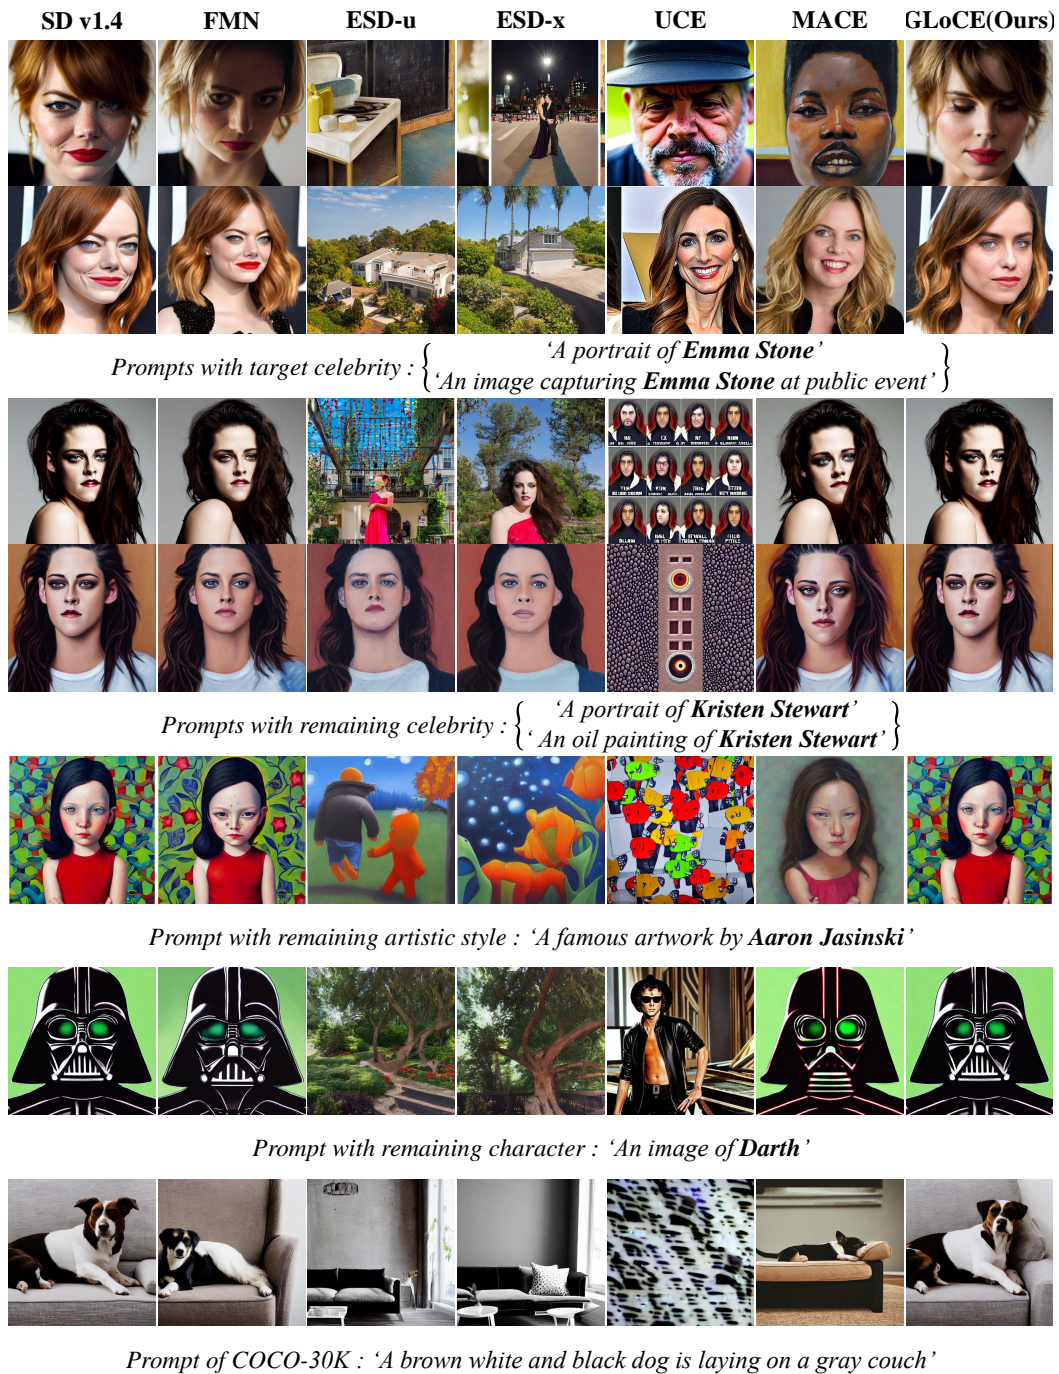

Figure H.1. Qualitative comparison on the multiple celebrities erasure. The images on the same row are generated using the same seed.



## H.2. Example 2. of Celebrities Erasure

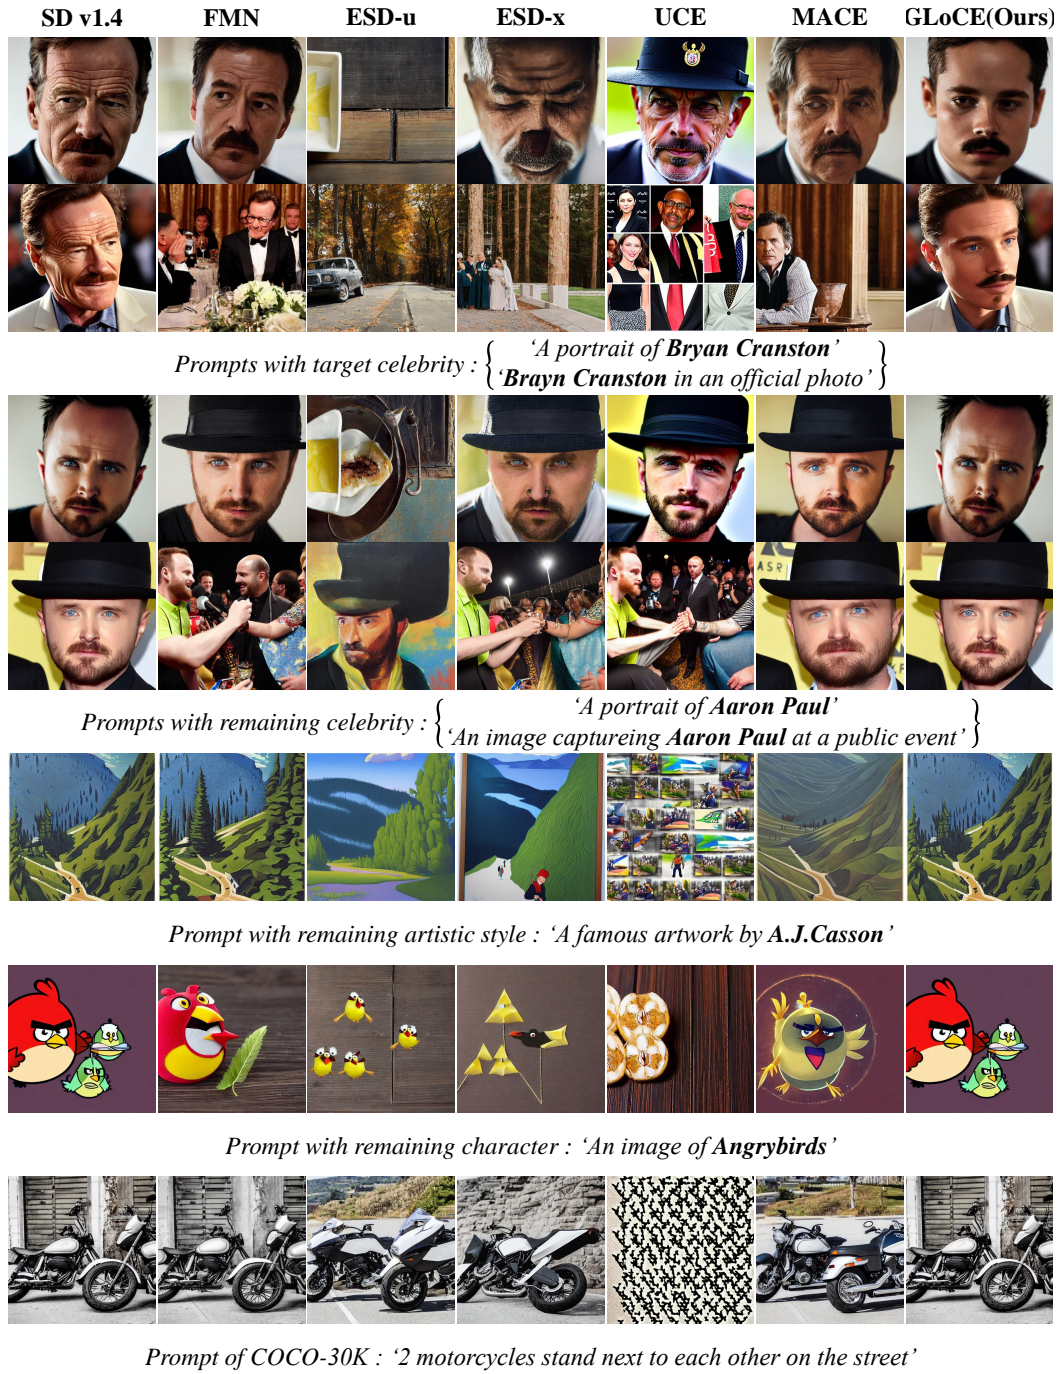

Figure H.2. Qualitative comparison on the multiple celebrities erasure. The images on the same row are generated using the same seed.



### H.3. Example 3. of Celebrities Erasure

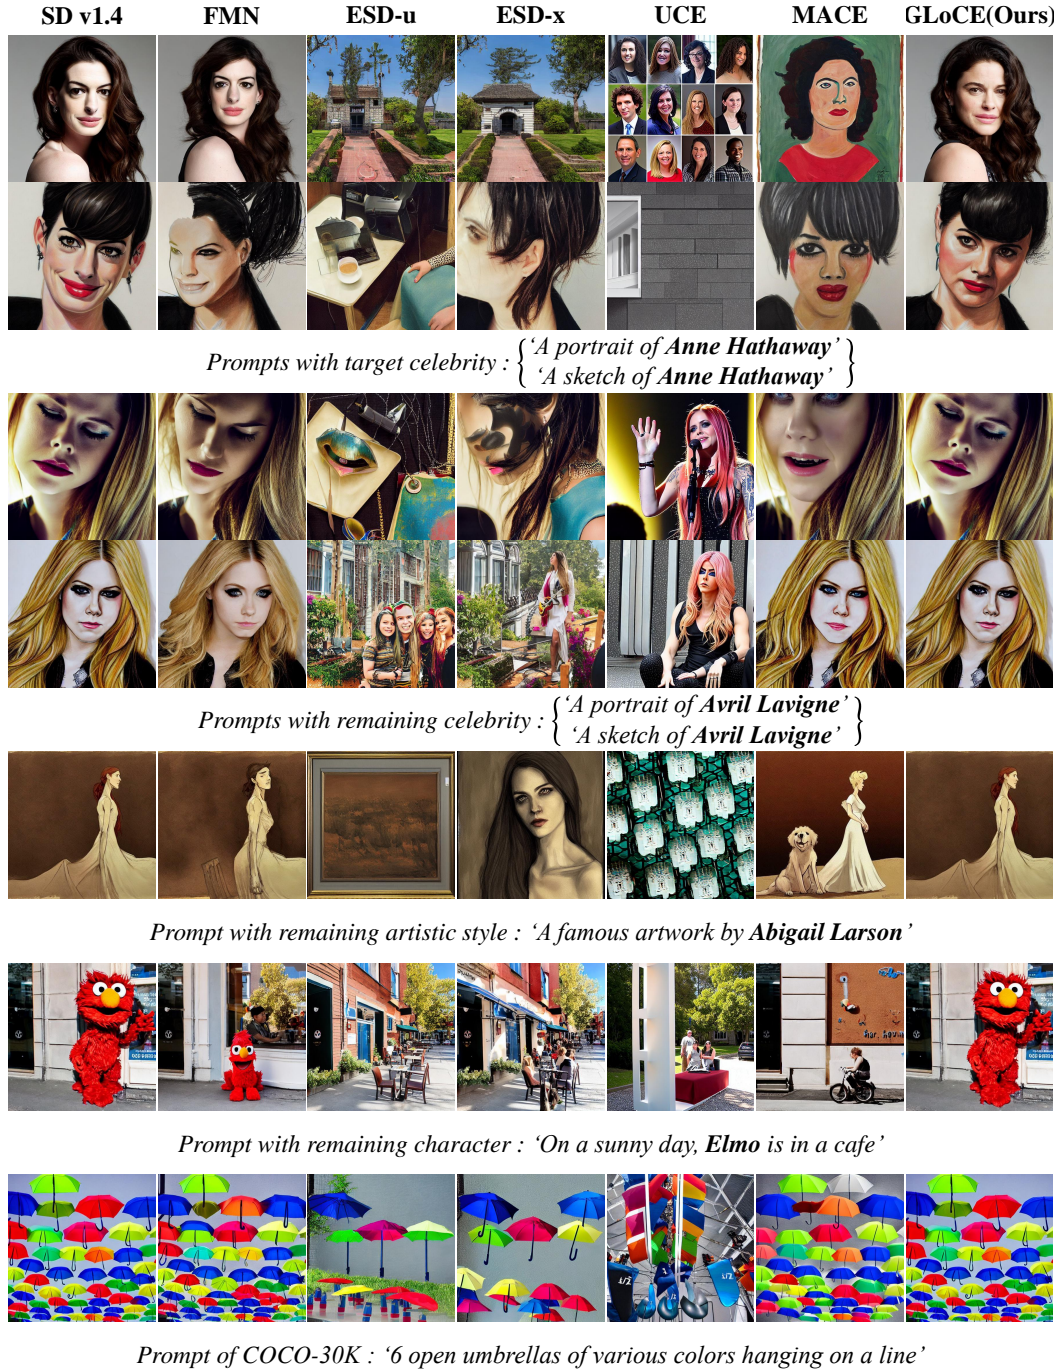

Figure H.3. Qualitative comparison on the multiple celebrities erasure. The images on the same row are generated using the same seed.



#### H.4. Example 4. of Celebrities Erasure

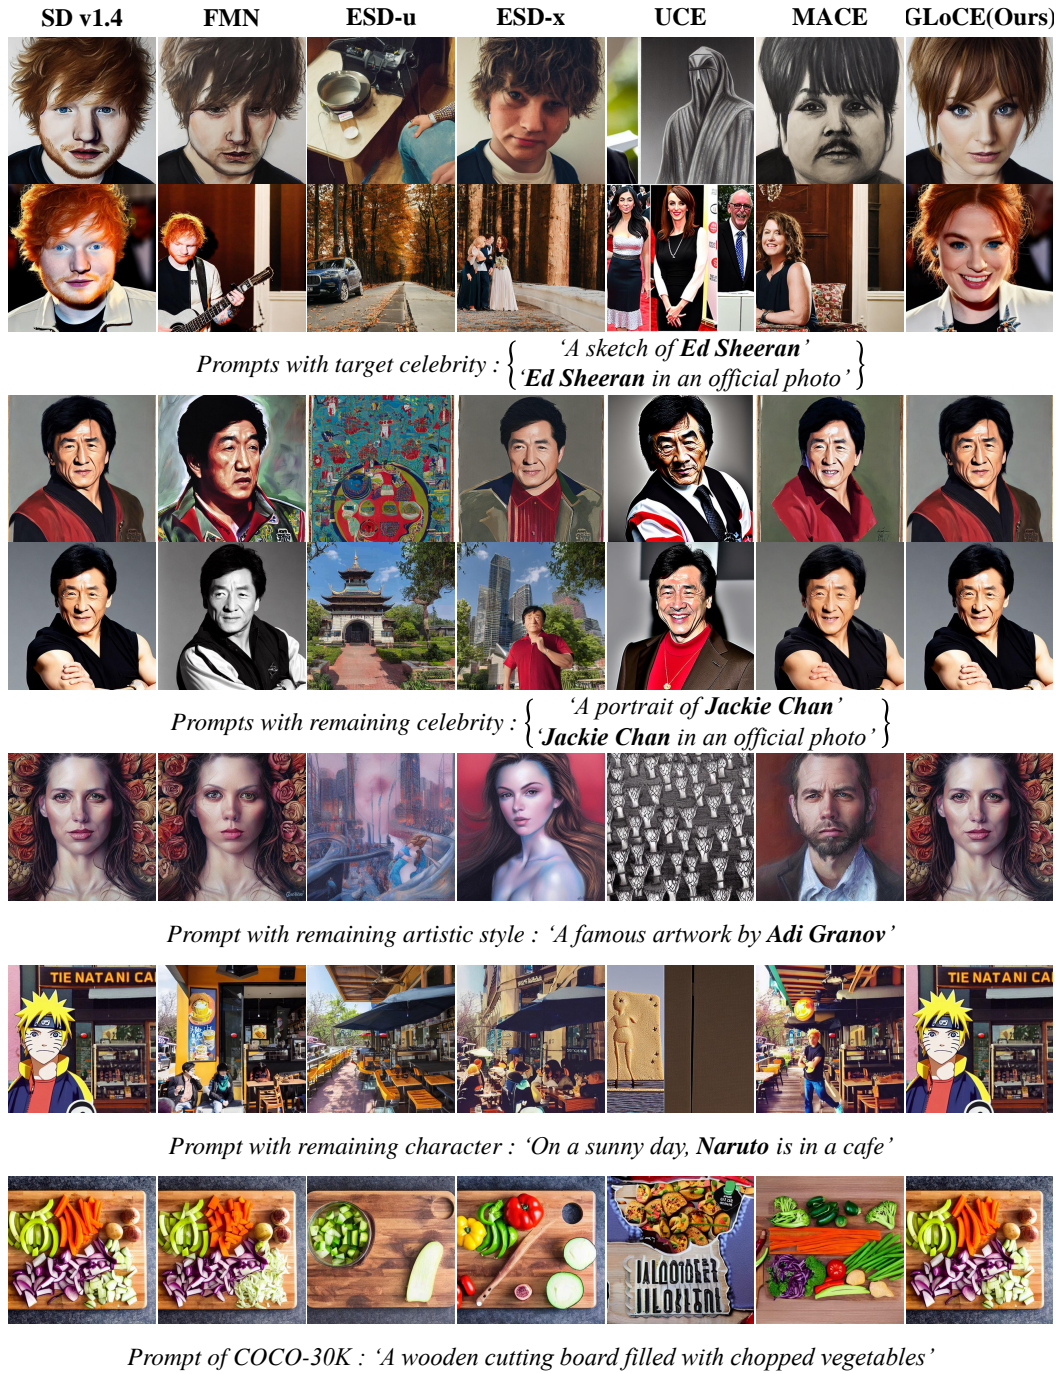

Figure H.4. Qualitative comparison on the multiple celebrities erasure. The images on the same row are generated using the same seed.

## I. Additional Qualitative Results on Explicit Concept Erasure

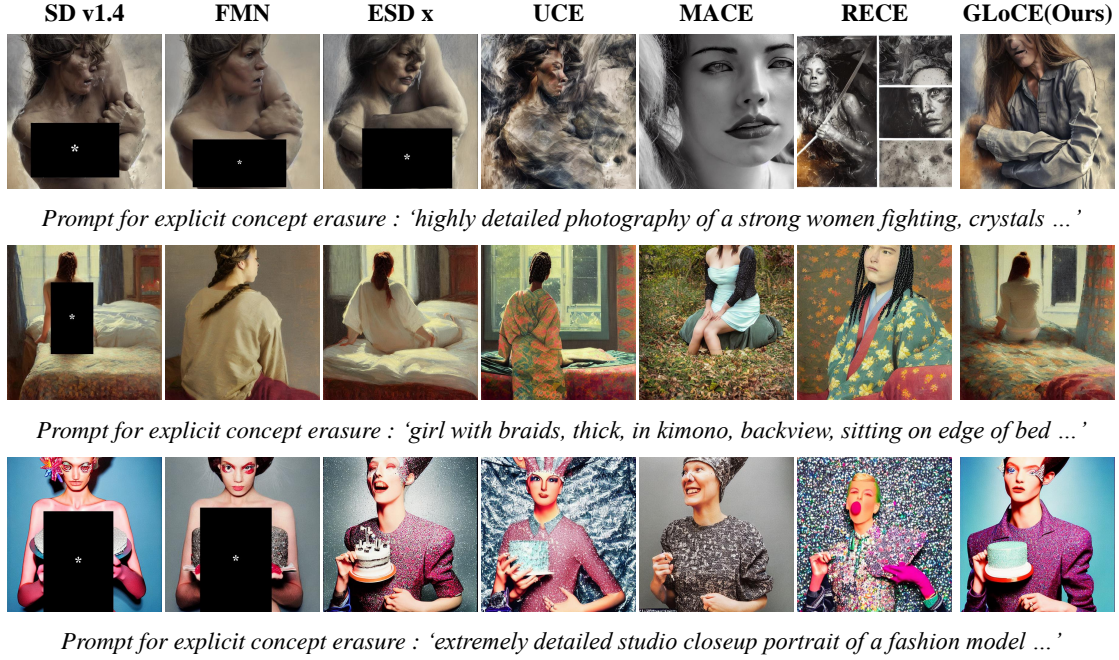

Figure I.1. Qualitative comparison on the fidelity evaluation of the explicit concept erasure when  $\eta = 1.0$ . The images on the same row are generated using the same seed.

## J. Additional Qualitative Results on Robustness to Adversarial Attack

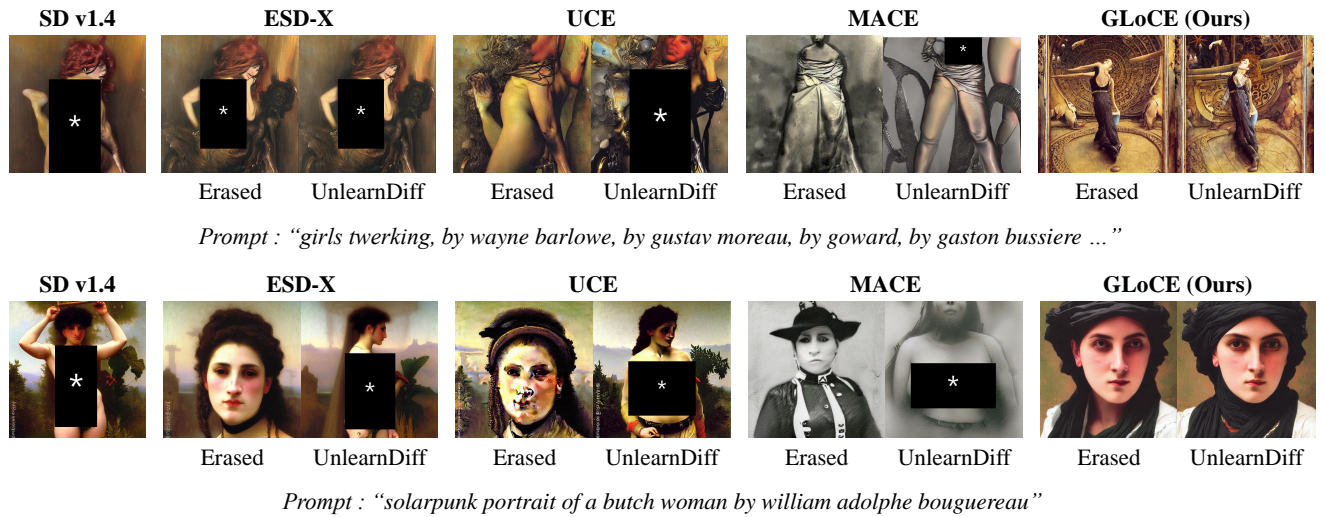

Figure J.1. Qualitative comparison on robustness to adversarial attacks on explicit contents erasure. The images on the same row are generated using the same seed.



## K. Additional Qualitative Results on Artistic Styles Erasure

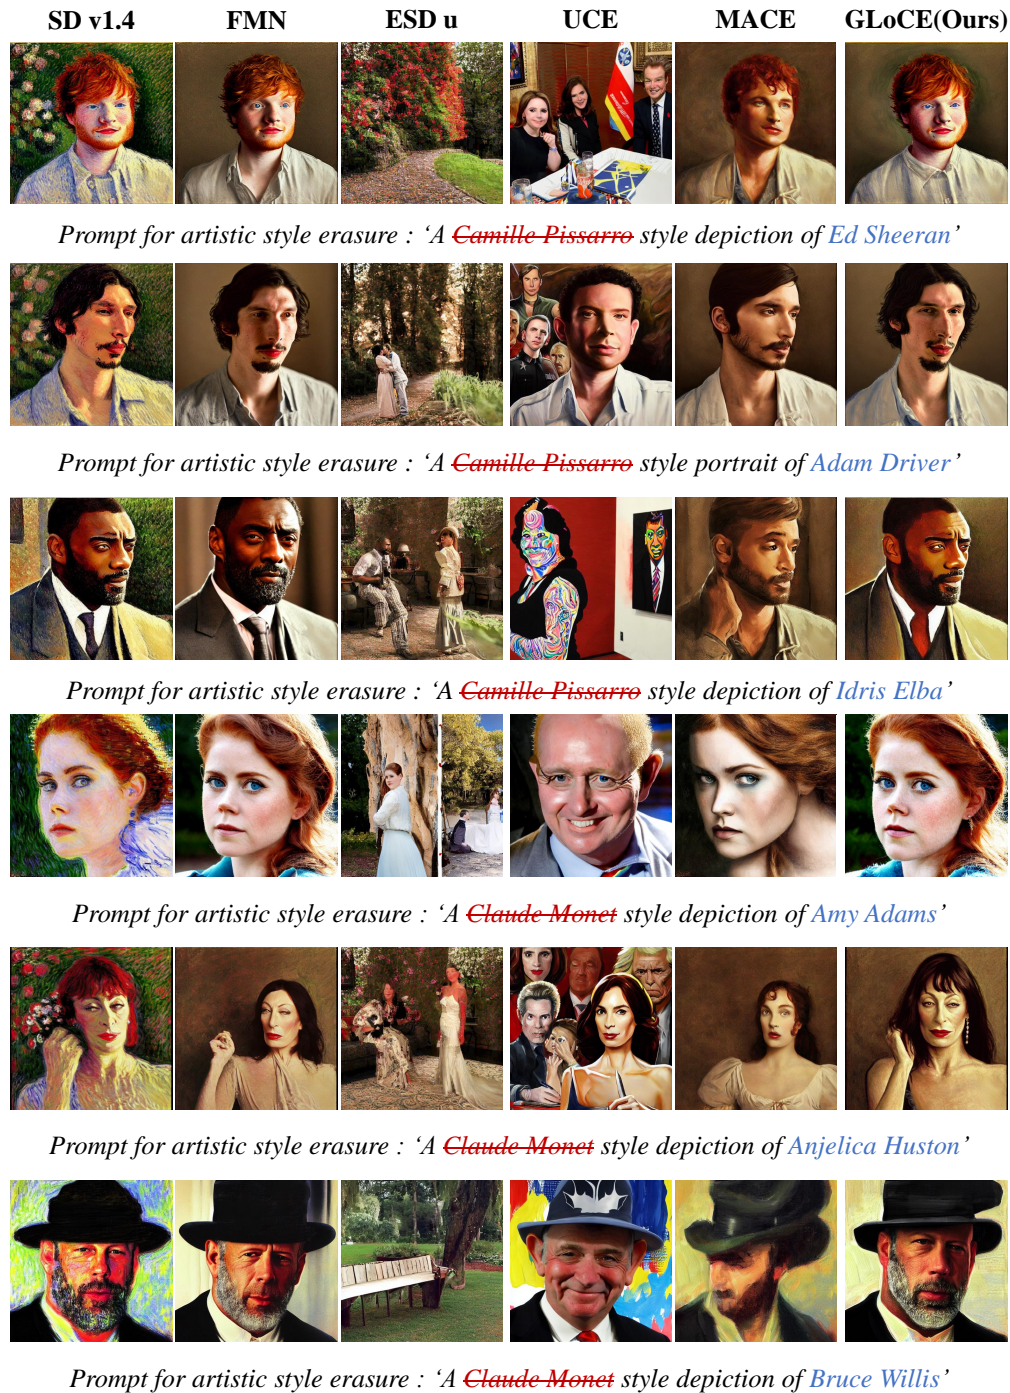

Figure K.1. Qualitative comparison on the fidelity evaluation of the multiple artistic style erasure. The images on the same row are generated using the same seed.

## References

- [A1] Nora Belrose, David Schneider-Joseph, Shauli Ravfogel, Ryan Cotterell, Edward Raff, and Stella Biderman. Leace: Perfect linear concept erasure in closed form. *NeurIPS*, 2023. 2, 7
- [A2] Kenneth Ward Church. Word2vec. *Natural Language Engineering*, 2017. 11
- [A3] Prafulla Dhariwal and Alexander Nichol. Diffusion models beat gans on image synthesis. *NeurIPS*, 2021. 1
- [A4] Yilun Du, Shuang Li, and Igor Mordatch. Compositional visual generation with energy based models. *NeurIPS*, 2020. 1
- [A5] Yilun Du, Shuang Li, Yash Sharma, Josh Tenenbaum, and Igor Mordatch. Unsupervised learning of compositional energy concepts. *Neurips*, 2021. 1
- [A6] Bradley Efron. Tweedie’s formula and selection bias. *Journal of the American Statistical Association*, 106(496):1602–1614, 2011. 1
- [A7] Patrick Esser, Sumith Kulal, Andreas Blattmann, Rahim Entezari, Jonas Müller, Harry Saini, Yam Levi, Dominik Lorenz, Axel Sauer, Frederic Boesel, et al. Scaling rectified flow transformers for high-resolution image synthesis. *ICML*, 2024. 7
- [A8] Rohit Gandikota, Joanna Materzynska, Jaden Fiotto-Kaufman, and David Bau. Erasing concepts from diffusion models. *ICCV*, 2023. 1, 7, 8, 10
- [A9] Rohit Gandikota, Hadas Orgad, Yonatan Belinkov, Joanna Materzynska, and David Bau. Unified concept editing in diffusion models. *WACV*, 2024. 1, 4, 10, 12
- [A10] Chao Gong, Kai Chen, Zhipeng Wei, Jingjing Chen, and Yu-Gang Jiang. Reliable and efficient concept erasure of text-to-image diffusion models. *ECCV*, 2024. 1, 10
- [A11] Nick Hasty, Ihor Kroosh, Dmitry Voitek, and Dmytro KorDuban. Giphy celebrity detector. <https://github.com/Giphy/celeb-detection-oss>, 2024. 9
- [A12] Jack Hessel, Ari Holtzman, Maxwell Forbes, Ronan Le Bras, and Yejin Choi. Clipscore: A reference-free evaluation metric for image captioning. *EMNLP*, 2021. 8
- [A13] Martin Heusel, Hubert Ramsauer, Thomas Unterthiner, Bernhard Nessler, and Sepp Hochreiter. Gans trained by a two time-scale update rule converge to a local nash equilibrium. *NeurIPS*, 2017. 8
- [A14] Jonathan Ho, Ajay Jain, and Pieter Abbeel. Denoising diffusion probabilistic models. *NeurIPS*, 2020. 1
- [A15] Sorea I, Proxima Centauri B, Erratica, and Stephen Young. Image synthesis style studies. <https://www.aiartapps.com/ai-art-apps/image-synthesis-style-studies>, 2024. 10
- [A16] Alexander Kirillov, Eric Mintun, Nikhila Ravi, Hanzi Mao, Chloe Rolland, Laura Gustafson, Tete Xiao, Spencer Whitehead, Alexander C Berg, Wan-Yen Lo, et al. Segment anything. *ICCV*, 2023. 1
- [A17] Xiao Liu, Yanan Zheng, Zhengxiao Du, Ming Ding, Yujie Qian, Zhilin Yang, and Jie Tang. Gpt understands, too. *AI Open*, 2023. 3
- [A18] Shilin Lu, Zilan Wang, Leyang Li, Yanzhu Liu, and Adams Wai-Kin Kong. Mace: Mass concept erasure in diffusion models. *CVPR*, 2024. 1, 4, 6, 8, 9, 10
- [A19] Mengyao Lyu, Yuhong Yang, Haiwen Hong, Hui Chen, Xuan Jin, Yuan He, Hui Xue, Jungong Han, and Guiguang Ding. One-dimensional adapter to rule them all: Concepts, diffusion models and erasing applications. *CVPR*, 2024. 4
- [A20] William Peebles and Saining Xie. Scalable diffusion models with transformers. *ICCV*, 2023. 7
- [A21] Minh Pham, Kelly O Marshall, Niv Cohen, Govind Mittal, and Chinmay Hegde. Circumventing concept erasure methods for text-to-image generative models. *ICLR*, 2024. 7
- [A22] Alec Radford, Jong Wook Kim, Chris Hallacy, Aditya Ramesh, Gabriel Goh, Sandhini Agarwal, Girish Sastry, Amanda Askell, Pamela Mishkin, Jack Clark, et al. Learning transferable visual models from natural language supervision. *ICML*, 2021. 8
- [A23] Robin Rombach. Stable diffusion 2.0 release. <https://stability.ai/news/stable-diffusion-v2-release>, 2022. 7
- [A24] Robin Rombach, Andreas Blattmann, Dominik Lorenz, Patrick Esser, and Björn Ommer. High-resolution image synthesis with latent diffusion models. *CVPR*, 2022. 1
- [A25] Robin Rombach, Andreas Blattmann, Dominik Lorenz, Patrick Esser, and Björn Ommer. Stable diffusion v1 model card. <https://huggingface.co/CompVis/stable-diffusion-v1-4>, 2022. 1, 7
- [A26] Yang Song, Jascha Sohl-Dickstein, Diederik P Kingma, Abhishek Kumar, Stefano Ermon, and Ben Poole. Score-based generative modeling through stochastic differential equations. *NeurIPS*, 2020. 1
- [A27] JD Sutherland, Michael Arbel, and Arthur Gretton. Demystifying mmd gans. *ICLR*, 2018. 8
- [A28] Aaron Van Den Oord, Oriol Vinyals, et al. Neural discrete representation learning. *NeurIPS*, 2017. 1
- [A29] Yuxin Wen, Neel Jain, John Kirchenbauer, Micah Goldblum, Jonas Geiping, and Tom Goldstein. Hard prompts made easy: Gradient-based discrete optimization for prompt tuning and discovery. *Advances in Neural Information Processing Systems*, 2023. 7
- [A30] Yimeng Zhang, Jinghan Jia, Xin Chen, Aochuan Chen, Yihua Zhang, Jiancheng Liu, Ke Ding, and Sijia Liu. To generate or not? safety-driven unlearned diffusion models are still easy to generate unsafe images... for now. *arXiv preprint arXiv:2310.11868*, 2023. 7, 11
